# Supplementary material for: Identification of CBPA as a New Inhibitor of PD-1/PD-L1 Interaction
Source: MDPI journal article supplement (doi:10.3390/ijms24043971), 2023-02-16
Supplement: s1 [file s1]

**Table S2. Transcripts differentially expressed in CBPA treated group compared to the vehicle control group**

| Gene Symbol   | CBPA treated_<br>Expression | Control Expression | log2 (CBPA<br>treated/Control) | Qvalue | Pvalue |
|---------------|-----------------------------|--------------------|--------------------------------|--------|--------|
| Zfp395        | 0.0033                      | 10.8033            | -12.3191                       | 0.0000 | 0.0000 |
| Pigt          | 0.0000                      | 10.2267            | -11.3643                       | 0.0000 | 0.0000 |
| Son           | 0.0000                      | 2.5600             | -11.1550                       | 0.0000 | 0.0000 |
| Tln2          | 0.0000                      | 1.3667             | -10.8610                       | 0.0000 | 0.0000 |
| Gpr161        | 0.0000                      | 1.9367             | -10.4969                       | 0.0000 | 0.0000 |
| Fbf1          | 0.0033                      | 2.5467             | -10.3910                       | 0.0000 | 0.0000 |
| Tlk1          | 0.0000                      | 3.3100             | -10.3590                       | 0.0000 | 0.0000 |
| Gdnf          | 0.0000                      | 2.4033             | -10.2258                       | 0.0000 | 0.0000 |
| Ctif          | 0.0000                      | 1.6600             | -10.1316                       | 0.0000 | 0.0000 |
| Tmem106c      | 0.0000                      | 6.2867             | -9.9305                        | 0.0000 | 0.0000 |
| Ldlr          | 0.0000                      | 1.9700             | -9.9281                        | 0.0000 | 0.0000 |
| Mast3         | 0.0000                      | 1.6100             | -9.8884                        | 0.0000 | 0.0000 |
| Zfp516        | 0.0000                      | 1.1067             | -9.8578                        | 0.0000 | 0.0000 |
| Lrch3         | 0.0000                      | 0.9433             | -9.8442                        | 0.0000 | 0.0000 |
| Kif7          | 0.0067                      | 1.8633             | -9.8384                        | 0.0000 | 0.0000 |
| Ciz1          | 0.0000                      | 3.3033             | -9.8338                        | 0.0026 | 0.0001 |
| Mgat4a        | 0.0000                      | 1.1167             | -9.7807                        | 0.0000 | 0.0000 |
| Afap112       | 0.0000                      | 1.9400             | -9.7483                        | 0.0000 | 0.0000 |
| Zfp869        | 0.0000                      | 2.3867             | -9.6826                        | 0.0000 | 0.0000 |
| Cacna2d1      | 0.0000                      | 1.0233             | -9.6620                        | 0.0000 | 0.0000 |
| Utp4          | 0.0000                      | 3.2900             | -9.6502                        | 0.0000 | 0.0000 |
| Heg1          | 0.0000                      | 0.7900             | -9.6280                        | 0.0032 | 0.0001 |
| Neb           | 0.0000                      | 0.3333             | -9.6076                        | 0.0147 | 0.0004 |
| Gstz1         | 0.0000                      | 4.5233             | -9.6005                        | 0.0000 | 0.0000 |
| Pias3         | 0.0000                      | 2.4367             | -9.5765                        | 0.0000 | 0.0000 |
| Nfya          | 0.0000                      | 1.8100             | -9.5549                        | 0.0002 | 0.0000 |
| Slc35c2       | 0.0000                      | 3.3000             | -9.5026                        | 0.0000 | 0.0000 |
| Stil          | 0.0000                      | 1.2300             | -9.4701                        | 0.0000 | 0.0000 |
| Adgrl1        | 0.0000                      | 0.8933             | -9.4524                        | 0.0000 | 0.0000 |
| Gpr153        | 0.0000                      | 1.5700             | -9.4284                        | 0.0000 | 0.0000 |
| Nbr1          | 0.0000                      | 1.3600             | -9.3645                        | 0.0000 | 0.0000 |
| Rbfox2        | 0.0000                      | 0.8633             | -9.3611                        | 0.0000 | 0.0000 |
| Med14         | 0.0000                      | 1.1733             | -9.3539                        | 0.0000 | 0.0000 |
| 3830406C13Rik | 0.0000                      | 2.5200             | -9.3172                        | 0.0000 | 0.0000 |
| Wnt10b        | 0.0000                      | 1.9533             | -9.3099                        | 0.0000 | 0.0000 |
| Prkcsh        | 0.0000                      | 2.8900             | -9.2916                        | 0.0222 | 0.0006 |
| Kcnh2         | 0.0000                      | 1.4067             | -9.2240                        | 0.0002 | 0.0000 |
| Parn          | 0.0000                      | 2.7167             | -9.1899                        | 0.0002 | 0.0000 |
| Lnpk          | 0.0000                      | 0.6400             | -9.1897                        | 0.0000 | 0.0000 |
| Arhgap29      | 0.0000                      | 1.0967             | -9.1896                        | 0.0034 | 0.0001 |
| Slc25a13      | 0.0000                      | 1.7100             | -9.1492                        | 0.0000 | 0.0000 |
| Sema5a        | 0.0000                      | 0.4767             | -9.1439                        | 0.0000 | 0.0000 |
| Cand2         | 0.0000                      | 1.4733             | -9.1351                        | 0.0000 | 0.0000 |
| Amotl2        | 0.0000                      | 1.2200             | -9.0819                        | 0.0000 | 0.0000 |
| Tacc1         | 0.0000                      | 0.6567             | -9.0784                        | 0.0000 | 0.0000 |
| Eif5a         | 0.0000                      | 3.6667             | -9.0576                        | 0.0000 | 0.0000 |
| Dennd2a       | 0.0000                      | 1.0567             | -9.0540                        | 0.0000 | 0.0000 |
| Plxnb1        | 0.0000                      | 0.5567             | -9.0299                        | 0.0000 | 0.0000 |
| Nmt2          | 0.0000                      | 1.0667             | -8.9843                        | 0.0000 | 0.0000 |
| Cldnd1        | 0.0000                      | 2.0900             | -8.9717                        | 0.0000 | 0.0000 |
| Derl2         | 0.0000                      | 1.2567             | -8.9618                        | 0.0000 | 0.0000 |
| Gas2          | 0.0000                      | 1.8833             | -8.9573                        | 0.0000 | 0.0000 |
| Rnpc3         | 0.0000                      | 1.1733             | -8.9284                        | 0.0000 | 0.0000 |
| Iws1          | 0.0000                      | 0.4533             | -8.8810                        | 0.0000 | 0.0000 |
| Apbb2         | 0.0000                      | 0.6867             | -8.8701                        | 0.0000 | 0.0000 |
| Alg2          | 0.0000                      | 1.4467             | -8.8578                        | 0.0000 | 0.0000 |
| Pcnp          | 0.0000                      | 1.8333             | -8.8457                        | 0.0000 | 0.0000 |
| Frmd4a        | 0.0000                      | 0.6133             | -8.8325                        | 0.0000 | 0.0000 |
| Bub3          | 0.0000                      | 2.0967             | -8.8294                        | 0.0000 | 0.0000 |
| Fam160a1      | 0.0000                      | 0.9667             | -8.8294                        | 0.0000 | 0.0000 |
| Pkp4          | 0.0000                      | 0.9067             | -8.8155                        | 0.0000 | 0.0000 |
| Pan2          | 0.0000                      | 0.9533             | -8.8116                        | 0.0000 | 0.0000 |
| Gsn           | 0.0000                      | 1.5300             | -8.8106                        | 0.0000 | 0.0000 |
| Tank          | 0.0000                      | 2.0700             | -8.7675                        | 0.0001 | 0.0000 |
| Relch         | 0.0000                      | 0.6767             | -8.6610                        | 0.0000 | 0.0000 |

|            |        |         |         |        |        |
|------------|--------|---------|---------|--------|--------|
| Mgme1      | 0.0000 | 1.3233  | -8.6327 | 0.0000 | 0.0000 |
| Trim37     | 0.0000 | 1.0567  | -8.5926 | 0.0000 | 0.0000 |
| C1qtnf1    | 0.0000 | 0.8100  | -8.5740 | 0.0000 | 0.0000 |
| Zfp462     | 0.0000 | 0.3100  | -8.5518 | 0.0044 | 0.0001 |
| Phc2       | 0.0000 | 1.4467  | -8.5340 | 0.0000 | 0.0000 |
| Nav2       | 0.0000 | 0.4233  | -8.5237 | 0.0000 | 0.0000 |
| Ppfia1     | 0.0000 | 0.6267  | -8.4540 | 0.0000 | 0.0000 |
| Jsrp1      | 0.0433 | 10.8967 | -8.4421 | 0.0070 | 0.0002 |
| Hoxc4      | 0.0000 | 0.9233  | -8.4364 | 0.0000 | 0.0000 |
| Myo9b      | 0.0067 | 1.4700  | -8.4217 | 0.0000 | 0.0000 |
| Begain     | 0.0000 | 1.1700  | -8.4165 | 0.0000 | 0.0000 |
| Nol4l      | 0.0033 | 0.4867  | -8.4158 | 0.0000 | 0.0000 |
| Gab1       | 0.0000 | 0.7533  | -8.3836 | 0.0002 | 0.0000 |
| Tmem87b    | 0.0000 | 0.6333  | -8.3535 | 0.0000 | 0.0000 |
| Greb1      | 0.0000 | 0.3667  | -8.3391 | 0.0000 | 0.0000 |
| Sun1       | 0.0000 | 0.7267  | -8.3335 | 0.0001 | 0.0000 |
| Cox18      | 0.0033 | 2.2700  | -8.3318 | 0.0000 | 0.0000 |
| Ift122     | 0.0167 | 3.6333  | -8.3120 | 0.0000 | 0.0000 |
| Med1       | 0.0000 | 1.1233  | -8.3028 | 0.0005 | 0.0000 |
| Clock      | 0.0000 | 0.2733  | -8.2789 | 0.0029 | 0.0001 |
| Iqce       | 0.0000 | 0.5133  | -8.2555 | 0.0001 | 0.0000 |
| Rnft2      | 0.0000 | 0.6400  | -8.2520 | 0.0000 | 0.0000 |
| Riox2      | 0.0000 | 2.1133  | -8.2479 | 0.0000 | 0.0000 |
| Tmem175    | 0.0000 | 1.4500  | -8.2039 | 0.0000 | 0.0000 |
| Ewsr1      | 0.0300 | 7.6300  | -8.1952 | 0.0000 | 0.0000 |
| Gata6      | 0.0000 | 0.8700  | -8.1760 | 0.0000 | 0.0000 |
| Trappc12   | 0.0000 | 1.1967  | -8.1742 | 0.0000 | 0.0000 |
| Tbc1d23    | 0.0000 | 0.6733  | -8.1082 | 0.0000 | 0.0000 |
| Cyfp1      | 0.0000 | 0.9267  | -8.0678 | 0.0000 | 0.0000 |
| Zdhhc1     | 0.0000 | 1.0200  | -8.0645 | 0.0084 | 0.0002 |
| Ssbp4      | 0.0000 | 1.7200  | -8.0331 | 0.0009 | 0.0000 |
| Sema6c     | 0.0000 | 0.6000  | -8.0182 | 0.0003 | 0.0000 |
| Hnrnpc     | 0.0000 | 1.4533  | -8.0180 | 0.0475 | 0.0014 |
| Pbrm1      | 0.0000 | 0.3067  | -8.0146 | 0.0354 | 0.0010 |
| Zfp661     | 0.0000 | 0.3700  | -7.9927 | 0.0000 | 0.0000 |
| Nuggc      | 0.0033 | 0.9300  | -7.9896 | 0.0006 | 0.0000 |
| Mtmr11     | 0.0000 | 0.8600  | -7.9861 | 0.0000 | 0.0000 |
| Cep250     | 0.0100 | 1.5667  | -7.9839 | 0.0000 | 0.0000 |
| Itga7      | 0.0000 | 0.5633  | -7.9648 | 0.0044 | 0.0001 |
| Cep112     | 0.0000 | 0.6800  | -7.9631 | 0.0268 | 0.0007 |
| Cchcr1     | 0.0033 | 0.8100  | -7.9437 | 0.0000 | 0.0000 |
| Mtf2       | 0.0000 | 0.5467  | -7.9414 | 0.0004 | 0.0000 |
| Dcun1d2    | 0.0000 | 0.7167  | -7.8792 | 0.0000 | 0.0000 |
| Cnot3      | 0.0000 | 0.6267  | -7.8705 | 0.0000 | 0.0000 |
| Gprec5a    | 0.0000 | 1.0067  | -7.8579 | 0.0000 | 0.0000 |
| Ankrd54    | 0.0000 | 1.1400  | -7.8406 | 0.0000 | 0.0000 |
| Gtf2i      | 0.0000 | 0.3800  | -7.8238 | 0.0000 | 0.0000 |
| Phf21a     | 0.0000 | 0.4767  | -7.7968 | 0.0000 | 0.0000 |
| Armc9      | 0.0000 | 0.4367  | -7.7835 | 0.0001 | 0.0000 |
| Ebf3       | 0.0000 | 0.3867  | -7.7753 | 0.0000 | 0.0000 |
| Ermard     | 0.0000 | 0.7567  | -7.7658 | 0.0000 | 0.0000 |
| Dhx30      | 0.0000 | 0.4367  | -7.7609 | 0.0007 | 0.0000 |
| Srl        | 0.0000 | 0.5067  | -7.7522 | 0.0036 | 0.0001 |
| Ift74      | 0.0000 | 0.9167  | -7.7485 | 0.0001 | 0.0000 |
| Jarid2     | 0.0000 | 0.3600  | -7.7364 | 0.0001 | 0.0000 |
| Cgref1     | 0.0000 | 1.4933  | -7.7357 | 0.0000 | 0.0000 |
| Slx4ip     | 0.0000 | 0.3833  | -7.7187 | 0.0000 | 0.0000 |
| Zfp532     | 0.0033 | 0.3333  | -7.6889 | 0.0000 | 0.0000 |
| Rfx3       | 0.0000 | 0.2100  | -7.6503 | 0.0008 | 0.0000 |
| Ogdhl      | 0.0167 | 1.9633  | -7.6181 | 0.0001 | 0.0000 |
| Mindy3     | 0.0000 | 1.0600  | -7.6149 | 0.0000 | 0.0000 |
| Ppip5k1    | 0.0000 | 0.3067  | -7.6008 | 0.0000 | 0.0000 |
| Prpsap2    | 0.0100 | 1.1133  | -7.5772 | 0.0001 | 0.0000 |
| Zfp707     | 0.0000 | 0.9667  | -7.5682 | 0.0000 | 0.0000 |
| Nrip1      | 0.0000 | 0.3733  | -7.5432 | 0.0010 | 0.0000 |
| Ncam1      | 0.0000 | 0.3267  | -7.5194 | 0.0000 | 0.0000 |
| Lhx6       | 0.0000 | 0.5233  | -7.5162 | 0.0000 | 0.0000 |
| Urgcp      | 0.0000 | 0.4967  | -7.5131 | 0.0045 | 0.0001 |
| Csgalnact1 | 0.0000 | 0.4000  | -7.4947 | 0.0001 | 0.0000 |
| Rapgef3    | 0.0000 | 0.4200  | -7.4776 | 0.0004 | 0.0000 |
| Kctd9      | 0.0000 | 1.1000  | -7.4684 | 0.0000 | 0.0000 |
| Ablim1     | 0.0000 | 0.2567  | -7.4610 | 0.0102 | 0.0002 |
| Fggy       | 0.0000 | 0.9967  | -7.4237 | 0.0025 | 0.0001 |
| Lzts3      | 0.0000 | 0.3667  | -7.4214 | 0.0000 | 0.0000 |
| Rcor3      | 0.0000 | 0.7767  | -7.4208 | 0.0002 | 0.0000 |

|          |        |         |         |        |        |
|----------|--------|---------|---------|--------|--------|
| Fam189a1 | 0.0000 | 0.3267  | -7.4169 | 0.0000 | 0.0000 |
| Sema3f   | 0.0000 | 0.4867  | -7.3751 | 0.0163 | 0.0004 |
| Utrn     | 0.0100 | 1.6333  | -7.3549 | 0.0002 | 0.0000 |
| Ift81    | 0.0000 | 0.4867  | -7.3508 | 0.0000 | 0.0000 |
| Kctd17   | 0.0000 | 0.9300  | -7.3353 | 0.0018 | 0.0000 |
| Eno1     | 0.0000 | 0.8333  | -7.3235 | 0.0002 | 0.0000 |
| Nrap     | 0.0200 | 3.1367  | -7.3024 | 0.0411 | 0.0012 |
| Rhbdf1   | 0.0000 | 0.5100  | -7.2966 | 0.0001 | 0.0000 |
| Lrsam1   | 0.0000 | 0.3533  | -7.2801 | 0.0000 | 0.0000 |
| Gfod2    | 0.0000 | 0.3433  | -7.2711 | 0.0002 | 0.0000 |
| Hsf4     | 0.0000 | 0.8867  | -7.2631 | 0.0001 | 0.0000 |
| Epb4111  | 0.0000 | 0.1633  | -7.2487 | 0.0000 | 0.0000 |
| Sox5     | 0.0000 | 0.1900  | -7.2221 | 0.0027 | 0.0001 |
| Arntl2   | 0.0000 | 0.4800  | -7.1488 | 0.0001 | 0.0000 |
| Cdc42bpa | 0.0000 | 0.1533  | -7.1193 | 0.0077 | 0.0002 |
| Slc19a1  | 0.0000 | 0.6200  | -7.1179 | 0.0008 | 0.0000 |
| Postn    | 0.0000 | 0.4267  | -7.1013 | 0.0001 | 0.0000 |
| Casq1    | 0.3967 | 52.6800 | -7.0896 | 0.0367 | 0.0010 |
| Tdrkh    | 0.0000 | 0.3167  | -7.0799 | 0.0006 | 0.0000 |
| Baz2b    | 0.0000 | 0.1533  | -7.0710 | 0.0000 | 0.0000 |
| Lpgat1   | 0.0000 | 0.1867  | -7.0530 | 0.0003 | 0.0000 |
| Klc4     | 0.0000 | 0.5000  | -7.0446 | 0.0034 | 0.0001 |
| Myh1     | 0.3300 | 40.8767 | -7.0325 | 0.0329 | 0.0009 |
| Slc29a2  | 0.0000 | 0.9767  | -7.0082 | 0.0001 | 0.0000 |
| Fam110b  | 0.0000 | 0.3533  | -7.0061 | 0.0015 | 0.0000 |
| Slain2   | 0.0267 | 3.2533  | -7.0016 | 0.0003 | 0.0000 |
| Tcf7l2   | 0.0000 | 0.2967  | -6.9947 | 0.0005 | 0.0000 |
| Palm     | 0.0467 | 5.2000  | -6.9625 | 0.0003 | 0.0000 |
| Plppr2   | 0.0000 | 0.4500  | -6.9547 | 0.0259 | 0.0007 |
| Pde4b    | 0.0000 | 0.2900  | -6.9486 | 0.0002 | 0.0000 |
| Ces1a    | 0.0000 | 0.5800  | -6.9464 | 0.0002 | 0.0000 |
| Sprtn    | 0.0000 | 0.5700  | -6.9155 | 0.0349 | 0.0010 |
| Slc9a3r2 | 0.0000 | 0.5400  | -6.8952 | 0.0001 | 0.0000 |
| Pex2     | 0.0000 | 0.5133  | -6.8858 | 0.0002 | 0.0000 |
| Gpr173   | 0.0000 | 0.2033  | -6.8371 | 0.0027 | 0.0001 |
| St7      | 0.0000 | 0.4800  | -6.7806 | 0.0003 | 0.0000 |
| Acacb    | 0.0100 | 0.8167  | -6.7539 | 0.0001 | 0.0000 |
| Adamts16 | 0.0000 | 0.2033  | -6.7344 | 0.0003 | 0.0000 |
| Retreg3  | 0.0000 | 0.3133  | -6.6777 | 0.0011 | 0.0000 |
| Iqck     | 0.0000 | 0.6333  | -6.6769 | 0.0397 | 0.0011 |
| Slc41a3  | 0.0000 | 0.4133  | -6.6062 | 0.0011 | 0.0000 |
| Galr2    | 0.0000 | 0.3800  | -6.5958 | 0.0241 | 0.0006 |
| Rtkn     | 0.0133 | 0.7367  | -6.5677 | 0.0070 | 0.0002 |
| Aplp2    | 0.1067 | 8.7467  | -6.5389 | 0.0244 | 0.0006 |
| Bpnt1    | 0.0000 | 0.2200  | -6.5255 | 0.0014 | 0.0000 |
| Tmem209  | 0.0000 | 0.2600  | -6.5252 | 0.0092 | 0.0002 |
| Cdkl3    | 0.0000 | 0.2633  | -6.5086 | 0.0010 | 0.0000 |
| Dnm1     | 0.0367 | 3.2267  | -6.4940 | 0.0059 | 0.0001 |
| Mta1     | 0.1100 | 8.4367  | -6.4815 | 0.0134 | 0.0003 |
| Gng4     | 0.0000 | 0.2767  | -6.4633 | 0.0167 | 0.0004 |
| Dlgap1   | 0.0033 | 0.1533  | -6.4122 | 0.0030 | 0.0001 |
| Cep164   | 0.0000 | 0.1000  | -6.3605 | 0.0072 | 0.0002 |
| Aktip    | 0.0233 | 1.8667  | -6.3561 | 0.0008 | 0.0000 |
| Espn     | 0.0000 | 0.2167  | -6.3446 | 0.0206 | 0.0005 |
| Artn     | 0.0000 | 0.3367  | -6.3101 | 0.0275 | 0.0007 |
| Shroom2  | 0.0000 | 0.0933  | -6.2503 | 0.0051 | 0.0001 |
| Slc23a3  | 0.0000 | 0.2367  | -6.2325 | 0.0125 | 0.0003 |
| Sdk1     | 0.0000 | 0.0800  | -6.2170 | 0.0113 | 0.0003 |
| Apopt1   | 0.0467 | 2.3267  | -6.2047 | 0.0008 | 0.0000 |
| Lca5l    | 0.0000 | 0.2200  | -6.1608 | 0.0160 | 0.0004 |
| Cradd    | 0.0000 | 0.3867  | -6.1572 | 0.0167 | 0.0004 |
| Ralgapa2 | 0.0000 | 0.0767  | -6.1444 | 0.0051 | 0.0001 |
| Pax3     | 0.0000 | 0.1767  | -6.1246 | 0.0189 | 0.0005 |
| Bdh2     | 0.0000 | 0.6033  | -6.1129 | 0.0185 | 0.0005 |
| Kifc3    | 0.0000 | 0.1700  | -6.0003 | 0.0097 | 0.0002 |
| Celf2    | 0.0067 | 0.4400  | -5.9954 | 0.0021 | 0.0000 |
| Fam118b  | 0.0333 | 1.5633  | -5.9767 | 0.0042 | 0.0001 |
| Mgl2     | 0.0167 | 0.8500  | -5.9425 | 0.0346 | 0.0010 |
| Actr5    | 0.0000 | 0.2700  | -5.9368 | 0.0463 | 0.0014 |
| Ankrd29  | 0.0000 | 0.1667  | -5.9194 | 0.0135 | 0.0003 |
| Cdh23    | 0.0033 | 0.1033  | -5.9063 | 0.0018 | 0.0000 |
| Slco1a5  | 0.0000 | 0.2167  | -5.9059 | 0.0279 | 0.0007 |
| Cept1    | 0.0000 | 0.5867  | -5.8533 | 0.0409 | 0.0012 |
| Coq6     | 0.0000 | 0.3400  | -5.8177 | 0.0342 | 0.0009 |
| Lilrb4a  | 0.1133 | 6.1100  | -5.8106 | 0.0330 | 0.0009 |
| Daxx     | 0.1700 | 8.7933  | -5.7575 | 0.0026 | 0.0001 |
| Lmbr1    | 0.0100 | 0.4767  | -5.7461 | 0.0382 | 0.0011 |

|               |          |         |          |         |        |        |
|---------------|----------|---------|----------|---------|--------|--------|
|               | Paqr7    | 0.0000  | 0.1300   | -5.7003 | 0.0330 | 0.0009 |
|               | Tnni1    | 0.0233  | 0.7033   | -5.5850 | 0.0046 | 0.0001 |
|               | Kansl2   | 0.0133  | 0.4600   | -5.5281 | 0.0107 | 0.0002 |
|               | Mical2   | 0.0067  | 0.1867   | -5.2776 | 0.0108 | 0.0002 |
|               | Zfp637   | 0.0600  | 1.5733   | -5.2629 | 0.0001 | 0.0000 |
|               | Chga     | 0.0200  | 0.6367   | -5.1979 | 0.0139 | 0.0003 |
|               | Accs     | 0.0067  | 0.1767   | -5.1442 | 0.0158 | 0.0004 |
|               | Disp2    | 0.0100  | 0.3033   | -5.0106 | 0.0299 | 0.0008 |
|               | Pdzd7    | 0.0233  | 0.5933   | -4.9662 | 0.0106 | 0.0002 |
|               | Crif1    | 0.1867  | 4.7733   | -4.7109 | 0.0000 | 0.0000 |
|               | Wdr37    | 0.1033  | 2.2000   | -4.5325 | 0.0244 | 0.0006 |
|               | Tmem38a  | 0.6133  | 13.4267  | -4.4784 | 0.0322 | 0.0009 |
|               | Nptx1    | 0.1133  | 2.1567   | -4.3996 | 0.0343 | 0.0009 |
|               | Dio3     | 0.0467  | 0.8167   | -4.2275 | 0.0071 | 0.0002 |
|               | Hspb6    | 5.9767  | 109.7467 | -4.2216 | 0.0483 | 0.0014 |
|               | Jmjd6    | 0.0667  | 1.0900   | -4.1416 | 0.0005 | 0.0000 |
|               | Pabpc1   | 5.0633  | 73.2767  | -3.8961 | 0.0281 | 0.0007 |
|               | Lyve1    | 0.2600  | 3.5400   | -3.8299 | 0.0002 | 0.0000 |
|               | Lmo7     | 0.0267  | 0.3267   | -3.7031 | 0.0021 | 0.0000 |
|               | Fbxl2    | 0.0667  | 0.5300   | -3.4169 | 0.0424 | 0.0012 |
|               | Hipk4    | 0.0767  | 0.6833   | -3.3260 | 0.0356 | 0.0010 |
|               | Cilp2    | 0.0433  | 0.4333   | -3.2941 | 0.0043 | 0.0001 |
|               | Arhgef10 | 0.3467  | 3.1833   | -3.2736 | 0.0000 | 0.0000 |
|               | Pgf      | 0.4467  | 3.7600   | -3.1946 | 0.0179 | 0.0004 |
|               | Atp5c1   | 2.6167  | 22.3533  | -3.1067 | 0.0140 | 0.0003 |
|               | Lox      | 0.7100  | 5.7467   | -3.0895 | 0.0087 | 0.0002 |
|               | Actn4    | 1.0367  | 8.0833   | -3.0384 | 0.0082 | 0.0002 |
|               | Nov      | 0.3367  | 2.4967   | -2.9749 | 0.0019 | 0.0000 |
|               | Ptprs    | 2.0033  | 14.0333  | -2.8902 | 0.0001 | 0.0000 |
|               | Gm10698  | 2.0000  | 13.7033  | -2.8817 | 0.0016 | 0.0000 |
|               | Ptk2     | 0.1933  | 1.2067   | -2.7302 | 0.0011 | 0.0000 |
|               | Serpinf1 | 14.2200 | 85.0600  | -2.6673 | 0.0361 | 0.0010 |
|               | Mgat3    | 1.0333  | 6.2467   | -2.6516 | 0.0000 | 0.0000 |
|               | Adar     | 0.9500  | 5.7167   | -2.6499 | 0.0000 | 0.0000 |
|               | Ctsk     | 2.5567  | 15.7700  | -2.6358 | 0.0430 | 0.0012 |
|               | Col18a1  | 0.2067  | 1.1833   | -2.6333 | 0.0026 | 0.0001 |
|               | Wbscr17  | 0.1267  | 0.6967   | -2.5406 | 0.0219 | 0.0006 |
|               | Vegfa    | 2.4300  | 13.1033  | -2.4485 | 0.0210 | 0.0005 |
|               | Wls      | 1.8333  | 9.3767   | -2.4324 | 0.0098 | 0.0002 |
|               | Mest     | 1.2133  | 6.3200   | -2.4125 | 0.0236 | 0.0006 |
|               | Gtf2ird1 | 0.2933  | 1.4500   | -2.4001 | 0.0019 | 0.0000 |
|               | Znhit1   | 1.1533  | 5.8900   | -2.3934 | 0.0022 | 0.0000 |
|               | Mfap5    | 2.6733  | 13.4500  | -2.3858 | 0.0004 | 0.0000 |
|               | Plip     | 0.2433  | 1.2100   | -2.3762 | 0.0131 | 0.0003 |
|               | Col1a1   | 37.5200 | 184.1433 | -2.3635 | 0.0001 | 0.0000 |
|               | Cilp     | 3.1933  | 16.4367  | -2.3458 | 0.0014 | 0.0000 |
|               | Pi16     | 2.5633  | 12.5900  | -2.2992 | 0.0186 | 0.0005 |
|               | Tle1     | 0.4467  | 2.0467   | -2.2949 | 0.0043 | 0.0001 |
|               | Bcs1l    | 0.8133  | 3.6567   | -2.2521 | 0.0000 | 0.0000 |
|               | Eri3     | 4.1333  | 18.5067  | -2.2089 | 0.0000 | 0.0000 |
|               | Mmp19    | 0.5800  | 2.5833   | -2.2087 | 0.0102 | 0.0002 |
|               | Adamts8  | 1.0467  | 4.6133   | -2.1866 | 0.0442 | 0.0013 |
|               | Zfp687   | 0.7067  | 3.0700   | -2.1726 | 0.0000 | 0.0000 |
|               | Mgp      | 9.6500  | 42.4600  | -2.1189 | 0.0475 | 0.0014 |
|               | Ebf4     | 0.3000  | 1.2600   | -2.0960 | 0.0033 | 0.0001 |
| D630003M21Rik |          | 0.2767  | 1.1100   | -2.0699 | 0.0249 | 0.0006 |
|               | Zfp428   | 0.8867  | 3.5733   | -2.0683 | 0.0112 | 0.0003 |
|               | Sec31a   | 0.5200  | 1.9700   | -1.9886 | 0.0062 | 0.0001 |
|               | Slc29a1  | 6.6867  | 25.1733  | -1.9788 | 0.0001 | 0.0000 |
|               | Plekha5  | 0.2667  | 1.0100   | -1.9457 | 0.0034 | 0.0001 |
|               | Gnas     | 1.5433  | 5.6067   | -1.9206 | 0.0006 | 0.0000 |
|               | Adck1    | 0.3667  | 1.3000   | -1.9096 | 0.0091 | 0.0002 |
|               | Adam12   | 0.4200  | 1.5000   | -1.8750 | 0.0000 | 0.0000 |
|               | Ncstn    | 3.9767  | 13.5767  | -1.8352 | 0.0196 | 0.0005 |
|               | Phf19    | 1.2467  | 4.2067   | -1.8269 | 0.0103 | 0.0002 |
|               | Mmp9     | 8.1233  | 28.9533  | -1.8244 | 0.0281 | 0.0007 |
|               | Pgghg    | 0.2400  | 0.8100   | -1.8229 | 0.0115 | 0.0003 |
|               | Sec24c   | 0.3633  | 1.2267   | -1.8118 | 0.0020 | 0.0000 |
|               | Col1a2   | 65.2533 | 217.0767 | -1.8033 | 0.0405 | 0.0012 |
|               | Cacna1a  | 0.1800  | 0.6167   | -1.8022 | 0.0072 | 0.0002 |
|               | Smyd2    | 2.6867  | 8.9500   | -1.7647 | 0.0000 | 0.0000 |
|               | Lypla1   | 0.5133  | 1.6433   | -1.7535 | 0.0370 | 0.0010 |
|               | Gabbr1   | 0.7167  | 2.3600   | -1.7146 | 0.0299 | 0.0008 |
|               | Loxl1    | 10.9433 | 33.6733  | -1.6800 | 0.0156 | 0.0004 |
|               | Tmem65   | 0.2367  | 0.7333   | -1.6774 | 0.0350 | 0.0010 |
|               | Acad8    | 1.0800  | 3.2567   | -1.6579 | 0.0288 | 0.0008 |
|               | Tead3    | 3.2800  | 9.9200   | -1.6561 | 0.0295 | 0.0008 |
|               | Ncor2    | 1.3967  | 4.2533   | -1.6387 | 0.0000 | 0.0000 |
|               | Sgms2    | 0.3367  | 0.9867   | -1.5931 | 0.0081 | 0.0002 |
|               | Akt1s1   | 1.7767  | 5.2833   | -1.5905 | 0.0000 | 0.0000 |
|               | Ddah1    | 0.4033  | 1.1700   | -1.5893 | 0.0234 | 0.0006 |
|               | Pkd1     | 0.4833  | 1.3867   | -1.5889 | 0.0341 | 0.0009 |

|               |         |         |         |        |        |
|---------------|---------|---------|---------|--------|--------|
| Thbs2         | 2.9267  | 8.4233  | -1.5748 | 0.0006 | 0.0000 |
| Pheta1        | 1.5700  | 4.4833  | -1.5692 | 0.0106 | 0.0002 |
| Pdxdc1        | 1.1333  | 3.1967  | -1.5462 | 0.0017 | 0.0000 |
| Brf2          | 1.4500  | 4.1500  | -1.5450 | 0.0030 | 0.0001 |
| Dlg4          | 1.8467  | 5.1233  | -1.5449 | 0.0370 | 0.0010 |
| C1qtnf6       | 2.6867  | 7.5133  | -1.5417 | 0.0386 | 0.0011 |
| Paip2         | 2.0500  | 5.6733  | -1.5375 | 0.0363 | 0.0010 |
| Rftn2         | 0.5900  | 1.6900  | -1.5215 | 0.0397 | 0.0011 |
| Clk2          | 2.1033  | 5.9333  | -1.5207 | 0.0033 | 0.0001 |
| Agap3         | 2.0867  | 5.7500  | -1.5108 | 0.0085 | 0.0002 |
| Mvk           | 3.6800  | 9.8267  | -1.4886 | 0.0348 | 0.0010 |
| Prpf19        | 3.1467  | 8.4267  | -1.4814 | 0.0179 | 0.0004 |
| St3gal4       | 4.7667  | 12.7567 | -1.4703 | 0.0228 | 0.0006 |
| Stra6         | 4.6233  | 12.4700 | -1.4614 | 0.0458 | 0.0013 |
| Utd1          | 10.9300 | 29.1400 | -1.4536 | 0.0022 | 0.0000 |
| Rptor         | 2.7800  | 7.0767  | -1.4094 | 0.0020 | 0.0000 |
| Zfp629        | 0.8933  | 2.2400  | -1.3736 | 0.0433 | 0.0013 |
| Ndufa4l2      | 3.4400  | 8.4267  | -1.3351 | 0.0089 | 0.0002 |
| Plekha6       | 1.8033  | 4.3733  | -1.3138 | 0.0249 | 0.0006 |
| Tmem218       | 1.1300  | 2.7333  | -1.2998 | 0.0297 | 0.0008 |
| Arntl         | 3.8100  | 9.1133  | -1.2984 | 0.0001 | 0.0000 |
| Klc1          | 2.2467  | 5.4367  | -1.2927 | 0.0397 | 0.0011 |
| Slit3         | 1.6100  | 3.8567  | -1.2925 | 0.0000 | 0.0000 |
| Map1a         | 0.5400  | 1.2967  | -1.2870 | 0.0048 | 0.0001 |
| Prmt2         | 1.2300  | 2.8867  | -1.2817 | 0.0397 | 0.0011 |
| H2afy         | 4.7967  | 11.2700 | -1.2726 | 0.0120 | 0.0003 |
| Adam8         | 7.0933  | 16.3600 | -1.2530 | 0.0039 | 0.0001 |
| Agpat2        | 3.4133  | 7.8333  | -1.2371 | 0.0121 | 0.0003 |
| Gale          | 4.3667  | 9.8733  | -1.2180 | 0.0015 | 0.0000 |
| Dtx4          | 1.1167  | 2.4967  | -1.2127 | 0.0003 | 0.0000 |
| Adm           | 2.2033  | 4.9367  | -1.1965 | 0.0091 | 0.0002 |
| 2310039H08Rik | 18.2933 | 40.2900 | -1.1887 | 0.0281 | 0.0007 |
| Hcfc1r1       | 37.4933 | 82.9700 | -1.1809 | 0.0069 | 0.0002 |
| Ift140        | 2.2500  | 4.8933  | -1.1694 | 0.0143 | 0.0003 |
| Zmynd11       | 1.1533  | 2.5333  | -1.1564 | 0.0010 | 0.0000 |
| Ube2e2        | 4.1100  | 8.8400  | -1.1431 | 0.0218 | 0.0005 |
| Rnf25         | 7.0333  | 15.0133 | -1.1341 | 0.0002 | 0.0000 |
| Mindy1        | 4.6933  | 10.0233 | -1.1250 | 0.0498 | 0.0015 |
| Pcbp2         | 17.4467 | 36.8267 | -1.1158 | 0.0000 | 0.0000 |
| Nid2          | 2.0133  | 4.2233  | -1.1114 | 0.0415 | 0.0012 |
| Abl2          | 1.2500  | 2.6200  | -1.1070 | 0.0423 | 0.0012 |
| Slc6a6        | 0.6000  | 1.2500  | -1.0937 | 0.0012 | 0.0000 |
| Mtch1         | 30.2767 | 62.9100 | -1.0876 | 0.0286 | 0.0008 |
| Rhoj          | 8.0800  | 16.8033 | -1.0840 | 0.0384 | 0.0011 |
| Nufip2        | 0.9533  | 1.9567  | -1.0818 | 0.0223 | 0.0006 |
| Tnk2          | 2.9567  | 6.0833  | -1.0793 | 0.0123 | 0.0003 |
| Hist1h1c      | 30.4700 | 62.9967 | -1.0732 | 0.0001 | 0.0000 |
| Tpm3          | 17.2667 | 35.6633 | -1.0618 | 0.0003 | 0.0000 |
| Tbc1d20       | 0.9900  | 2.0300  | -1.0602 | 0.0199 | 0.0005 |
| Igfbp3        | 47.4967 | 96.5200 | -1.0552 | 0.0002 | 0.0000 |
| Tada3         | 3.5500  | 7.0400  | -1.0252 | 0.0311 | 0.0008 |
| Micall2       | 6.9000  | 13.4633 | -1.0004 | 0.0176 | 0.0004 |
| Flcn          | 5.0033  | 9.7133  | -1.0003 | 0.0295 | 0.0008 |
| Gapdh-ps15    | 19.2767 | 37.7433 | -0.9900 | 0.0006 | 0.0000 |
| Ctgf          | 11.9700 | 23.2100 | -0.9893 | 0.0097 | 0.0002 |
| Dcaf8         | 5.9133  | 11.5433 | -0.9781 | 0.0032 | 0.0001 |
| Plpp3         | 9.5033  | 17.9433 | -0.9435 | 0.0295 | 0.0008 |
| Gtf3c5        | 6.7200  | 12.2667 | -0.9084 | 0.0039 | 0.0001 |
| Tbc1d9b       | 1.3700  | 2.5033  | -0.9064 | 0.0023 | 0.0000 |
| 2310009B15Rik | 7.4933  | 13.6433 | -0.8875 | 0.0268 | 0.0007 |
| Tpcn1         | 28.1667 | 49.7500 | -0.8663 | 0.0146 | 0.0003 |
| Tnrc18        | 3.1600  | 5.5367  | -0.8434 | 0.0061 | 0.0001 |
| Cebpz         | 3.9267  | 6.8600  | -0.8310 | 0.0207 | 0.0005 |
| Eva1b         | 12.6733 | 21.7967 | -0.8139 | 0.0314 | 0.0008 |
| Mrnip         | 4.1867  | 7.0767  | -0.7903 | 0.0310 | 0.0008 |
| Sirt6         | 8.9900  | 15.0700 | -0.7743 | 0.0295 | 0.0008 |
| Ccdc102a      | 6.5700  | 10.9800 | -0.7699 | 0.0475 | 0.0014 |
| Tgfb3         | 3.9167  | 6.4700  | -0.7538 | 0.0337 | 0.0009 |
| Ubap2l        | 2.0033  | 3.2567  | -0.7289 | 0.0239 | 0.0006 |
| Kdm4a         | 10.5267 | 16.8333 | -0.7140 | 0.0087 | 0.0002 |
| 4931406P16Rik | 5.6567  | 9.0700  | -0.7123 | 0.0035 | 0.0001 |
| Ptov1         | 3.4667  | 5.3867  | -0.6588 | 0.0085 | 0.0002 |
| BC004004      | 17.9133 | 27.2867 | -0.6370 | 0.0249 | 0.0006 |
| Tmem138       | 11.1033 | 15.7233 | -0.5300 | 0.0204 | 0.0005 |
| Stk38         | 9.4633  | 6.0600  | 0.6290  | 0.0391 | 0.0011 |
| Pin4          | 33.7333 | 20.9233 | 0.6646  | 0.0201 | 0.0005 |
| Mapk14        | 14.2767 | 8.6667  | 0.7013  | 0.0494 | 0.0015 |
| LOC108167440  | 78.1100 | 46.7133 | 0.7109  | 0.0088 | 0.0002 |
| Psm5          | 7.7967  | 4.6767  | 0.7236  | 0.0092 | 0.0002 |
| Prps2         | 12.7467 | 7.5767  | 0.7381  | 0.0072 | 0.0002 |
| Ctsc          | 24.9300 | 14.4500 | 0.7598  | 0.0000 | 0.0000 |
| C9orf72       | 4.5000  | 2.5267  | 0.8047  | 0.0420 | 0.0012 |

|               |           |          |        |        |        |
|---------------|-----------|----------|--------|--------|--------|
| Wac           | 1.8300    | 1.0200   | 0.8285 | 0.0399 | 0.0011 |
| Zscan29       | 2.6400    | 1.4600   | 0.8457 | 0.0360 | 0.0010 |
| Snx11         | 5.7633    | 2.9800   | 0.9356 | 0.0003 | 0.0000 |
| Usp37         | 3.2200    | 1.5867   | 0.9820 | 0.0078 | 0.0002 |
| Lyz2          | 1069.9700 | 533.6667 | 0.9892 | 0.0005 | 0.0000 |
| Tmc4          | 3.4000    | 1.6633   | 1.0066 | 0.0021 | 0.0000 |
| Cgas          | 3.7200    | 1.8433   | 1.0083 | 0.0221 | 0.0006 |
| BC017158      | 7.4400    | 3.6767   | 1.0105 | 0.0224 | 0.0006 |
| Ctss          | 212.9200  | 102.0167 | 1.0191 | 0.0005 | 0.0000 |
| Stat5b        | 1.3167    | 0.6400   | 1.0229 | 0.0088 | 0.0002 |
| Atg5          | 11.3367   | 5.5100   | 1.0399 | 0.0471 | 0.0014 |
| Lyz1          | 99.0367   | 47.2233  | 1.0612 | 0.0241 | 0.0006 |
| Safb2         | 3.6200    | 1.7100   | 1.0627 | 0.0423 | 0.0012 |
| Cab39l        | 12.9167   | 6.1200   | 1.0698 | 0.0198 | 0.0005 |
| Zcche8        | 1.2267    | 0.5633   | 1.0916 | 0.0077 | 0.0002 |
| Tial1         | 26.0267   | 11.7067  | 1.1282 | 0.0485 | 0.0014 |
| Inpp1         | 2.1200    | 0.9533   | 1.1348 | 0.0055 | 0.0001 |
| Ogt           | 12.8000   | 5.7233   | 1.1424 | 0.0085 | 0.0002 |
| Xrn1          | 1.3400    | 0.5933   | 1.1568 | 0.0009 | 0.0000 |
| Clasp2        | 1.2233    | 0.5300   | 1.1593 | 0.0310 | 0.0008 |
| Tlr8          | 1.2467    | 0.5400   | 1.1864 | 0.0007 | 0.0000 |
| Pttg1         | 3.6633    | 1.5800   | 1.2154 | 0.0083 | 0.0002 |
| Csf2ra        | 30.8700   | 13.2467  | 1.2165 | 0.0268 | 0.0007 |
| Erap1         | 9.5133    | 4.0100   | 1.2375 | 0.0002 | 0.0000 |
| Nabp1         | 8.9167    | 3.7600   | 1.2460 | 0.0167 | 0.0004 |
| Tnfsf13       | 3.8300    | 1.5767   | 1.2575 | 0.0026 | 0.0001 |
| Zbtb18        | 2.9333    | 1.2133   | 1.2634 | 0.0078 | 0.0002 |
| Cd84          | 8.8933    | 3.6367   | 1.2721 | 0.0478 | 0.0014 |
| Tor1aip2      | 2.2800    | 0.9400   | 1.2807 | 0.0372 | 0.0010 |
| Reep6         | 6.4433    | 2.6200   | 1.2922 | 0.0030 | 0.0001 |
| Omp           | 1.4733    | 0.5867   | 1.2960 | 0.0191 | 0.0005 |
| Poc5          | 1.9300    | 0.7800   | 1.2961 | 0.0000 | 0.0000 |
| Clstn3        | 0.6900    | 0.2733   | 1.3138 | 0.0154 | 0.0004 |
| Wdr20         | 0.7367    | 0.2900   | 1.3282 | 0.0388 | 0.0011 |
| Cd274         | 16.1633   | 6.3667   | 1.3289 | 0.0104 | 0.0002 |
| Mphosph9      | 2.2867    | 0.9067   | 1.3299 | 0.0147 | 0.0004 |
| Nlrc5         | 10.4700   | 4.1000   | 1.3430 | 0.0005 | 0.0000 |
| Cp            | 4.5733    | 1.7900   | 1.3487 | 0.0012 | 0.0000 |
| Nmb           | 0.4233    | 0.1633   | 1.3569 | 0.0399 | 0.0011 |
| Tgtp2         | 65.1033   | 24.8700  | 1.3842 | 0.0270 | 0.0007 |
| Cxcl9         | 48.6400   | 18.3300  | 1.3950 | 0.0364 | 0.0010 |
| Irgm1         | 63.9633   | 23.9567  | 1.4074 | 0.0123 | 0.0003 |
| 217615        | 8.4967    | 3.1733   | 1.4200 | 0.0178 | 0.0004 |
| Parp14        | 28.7267   | 10.7200  | 1.4314 | 0.0251 | 0.0007 |
| Ipmk          | 6.4533    | 2.3000   | 1.4485 | 0.0167 | 0.0004 |
| Carnmt1       | 1.9333    | 0.6900   | 1.4563 | 0.0417 | 0.0012 |
| Gbp5          | 23.4700   | 8.5100   | 1.4609 | 0.0035 | 0.0001 |
| Usp38         | 6.1333    | 2.1633   | 1.5100 | 0.0228 | 0.0006 |
| Gm4841        | 6.0033    | 2.0567   | 1.5114 | 0.0064 | 0.0001 |
| Optn          | 3.8067    | 1.2933   | 1.5444 | 0.0008 | 0.0000 |
| Gm12185       | 3.6100    | 1.2433   | 1.5505 | 0.0231 | 0.0006 |
| Cox17         | 3.5833    | 1.2367   | 1.5519 | 0.0288 | 0.0008 |
| Atp8b4        | 2.4967    | 0.8500   | 1.5586 | 0.0381 | 0.0011 |
| Abcc5         | 1.3633    | 0.4600   | 1.5624 | 0.0144 | 0.0003 |
| Mycbp2        | 0.3633    | 0.1233   | 1.5745 | 0.0023 | 0.0000 |
| Wiz           | 2.7967    | 0.9000   | 1.6145 | 0.0040 | 0.0001 |
| Psme2         | 5.8533    | 1.8367   | 1.6500 | 0.0237 | 0.0006 |
| Ccnl1         | 1.5700    | 0.4933   | 1.6501 | 0.0169 | 0.0004 |
| Serpinb6b     | 18.5767   | 5.8967   | 1.6668 | 0.0414 | 0.0012 |
| Tlcd2         | 4.1333    | 1.3033   | 1.6734 | 0.0071 | 0.0002 |
| Itsn2         | 6.4000    | 1.9833   | 1.6965 | 0.0451 | 0.0013 |
| Gclc          | 15.0067   | 4.6400   | 1.6995 | 0.0375 | 0.0010 |
| Tom1l1        | 3.4933    | 1.0700   | 1.7025 | 0.0000 | 0.0000 |
| Dgki          | 0.1833    | 0.0567   | 1.7046 | 0.0466 | 0.0014 |
| Herc2         | 3.0200    | 0.9000   | 1.7047 | 0.0092 | 0.0002 |
| Gm12250       | 24.6167   | 7.5467   | 1.7078 | 0.0064 | 0.0001 |
| Zfp672        | 1.6100    | 0.4733   | 1.7321 | 0.0005 | 0.0000 |
| Rhbdf2        | 8.4067    | 2.4967   | 1.7571 | 0.0241 | 0.0006 |
| Malt1         | 7.5267    | 2.2067   | 1.7711 | 0.0314 | 0.0008 |
| Ctrl          | 2.0333    | 0.5900   | 1.7751 | 0.0314 | 0.0008 |
| Fyb           | 3.4133    | 0.9867   | 1.7815 | 0.0397 | 0.0011 |
| Gata3         | 3.3733    | 0.9633   | 1.8018 | 0.0000 | 0.0000 |
| Mcmcdc2       | 3.2500    | 0.9367   | 1.8106 | 0.0172 | 0.0004 |
| Usp48         | 3.8567    | 1.0967   | 1.8249 | 0.0245 | 0.0006 |
| Klrc1         | 2.7667    | 0.7733   | 1.8380 | 0.0441 | 0.0013 |
| Klra2         | 4.0300    | 1.0967   | 1.8584 | 0.0000 | 0.0000 |
| D1Ert622e     | 5.0333    | 1.3967   | 1.8773 | 0.0361 | 0.0010 |
| Zfp983        | 1.0300    | 0.2733   | 1.8985 | 0.0337 | 0.0009 |
| Rbm3          | 13.4400   | 3.5200   | 1.9075 | 0.0076 | 0.0002 |
| Pum2          | 2.8500    | 0.7400   | 1.9153 | 0.0043 | 0.0001 |
| Il1a          | 2.4800    | 0.6333   | 1.9415 | 0.0001 | 0.0000 |
| 4930523C07Rik | 0.9433    | 0.2400   | 1.9437 | 0.0001 | 0.0000 |

|               |          |         |        |        |        |
|---------------|----------|---------|--------|--------|--------|
| Clec12a       | 2.4433   | 0.6267  | 1.9817 | 0.0016 | 0.0000 |
| Ppef2         | 0.6167   | 0.1667  | 1.9820 | 0.0471 | 0.0014 |
| Zbtb32        | 3.9500   | 0.9433  | 2.0257 | 0.0174 | 0.0004 |
| Far2          | 0.9133   | 0.2233  | 2.0369 | 0.0384 | 0.0011 |
| Pnpt1         | 5.3267   | 1.2600  | 2.0640 | 0.0013 | 0.0000 |
| Il18rap       | 4.0367   | 0.9833  | 2.0697 | 0.0008 | 0.0000 |
| Sirt7         | 2.4233   | 0.5900  | 2.0704 | 0.0226 | 0.0006 |
| 1700066C05Rik | 3.4033   | 0.8333  | 2.0806 | 0.0142 | 0.0003 |
| Ltb4r2        | 1.0667   | 0.2600  | 2.0823 | 0.0441 | 0.0013 |
| Lmbrd1        | 2.7767   | 0.6567  | 2.0837 | 0.0093 | 0.0002 |
| Chmp2a        | 4.6133   | 1.0333  | 2.0955 | 0.0184 | 0.0005 |
| Fam111a       | 1.6733   | 0.3933  | 2.1340 | 0.0358 | 0.0010 |
| Edem1         | 3.3167   | 0.7567  | 2.1395 | 0.0420 | 0.0012 |
| Lcp1          | 2.0900   | 0.4800  | 2.1539 | 0.0335 | 0.0009 |
| Gbp4          | 18.1367  | 4.0467  | 2.1849 | 0.0000 | 0.0000 |
| Dmxl1         | 1.3967   | 0.3033  | 2.2032 | 0.0131 | 0.0003 |
| Casp8         | 8.3700   | 1.8033  | 2.2060 | 0.0228 | 0.0006 |
| Cdk12         | 2.5500   | 0.5433  | 2.2147 | 0.0228 | 0.0006 |
| Ppm1h         | 1.9233   | 0.4233  | 2.2147 | 0.0437 | 0.0013 |
| Tnk1          | 0.4500   | 0.1000  | 2.2207 | 0.0355 | 0.0010 |
| Tmem51        | 4.7367   | 1.0133  | 2.2441 | 0.0329 | 0.0009 |
| Man1b1        | 9.3733   | 1.8467  | 2.3181 | 0.0000 | 0.0000 |
| Cybb          | 42.2433  | 8.5700  | 2.3287 | 0.0185 | 0.0005 |
| Gbp9          | 7.5033   | 1.4733  | 2.3752 | 0.0089 | 0.0002 |
| Zfp207        | 2.9433   | 0.5433  | 2.4595 | 0.0389 | 0.0011 |
| Alx4          | 0.5867   | 0.1100  | 2.4648 | 0.0491 | 0.0015 |
| Kmt2c         | 0.3967   | 0.0667  | 2.4683 | 0.0092 | 0.0002 |
| Gda           | 9.8300   | 1.7867  | 2.4805 | 0.0243 | 0.0006 |
| Rbl1          | 5.9200   | 1.0233  | 2.5474 | 0.0008 | 0.0000 |
| Ncor1         | 1.0600   | 0.1800  | 2.5511 | 0.0006 | 0.0000 |
| Pstpip1       | 7.1700   | 1.2300  | 2.5559 | 0.0019 | 0.0000 |
| Dennd4a       | 7.9767   | 1.3667  | 2.5640 | 0.0340 | 0.0009 |
| Zbtb8os       | 1.8200   | 0.3467  | 2.5644 | 0.0074 | 0.0002 |
| Ifi203        | 6.7033   | 1.1167  | 2.5914 | 0.0366 | 0.0010 |
| Fam213a       | 4.1100   | 0.7067  | 2.6187 | 0.0079 | 0.0002 |
| Mdm4          | 11.1933  | 1.8067  | 2.6233 | 0.0021 | 0.0000 |
| Ehbp111       | 5.1333   | 0.8333  | 2.6561 | 0.0100 | 0.0002 |
| Dennd6a       | 0.7933   | 0.1267  | 2.6733 | 0.0228 | 0.0006 |
| Vav3          | 1.0167   | 0.1633  | 2.6898 | 0.0278 | 0.0007 |
| Dkk11         | 4.6733   | 0.7133  | 2.7484 | 0.0235 | 0.0006 |
| Trim30a       | 38.2900  | 5.6700  | 2.8011 | 0.0246 | 0.0006 |
| Cpox          | 86.5933  | 11.9933 | 2.8536 | 0.0340 | 0.0009 |
| Plbd1         | 2.7867   | 0.4033  | 2.8680 | 0.0430 | 0.0012 |
| Asb13         | 3.7300   | 0.5033  | 2.9042 | 0.0061 | 0.0001 |
| H2-M2         | 2.0267   | 0.2767  | 2.9238 | 0.0046 | 0.0001 |
| Plcl2         | 2.7567   | 0.3733  | 2.9384 | 0.0363 | 0.0010 |
| Tfrc          | 38.4700  | 5.0367  | 2.9441 | 0.0091 | 0.0002 |
| Cd244a        | 3.2267   | 0.4233  | 2.9670 | 0.0130 | 0.0003 |
| Galnt3        | 1.5467   | 0.2100  | 2.9682 | 0.0369 | 0.0010 |
| Pou6f1        | 2.2367   | 0.2967  | 2.9847 | 0.0373 | 0.0010 |
| Jaml          | 5.1467   | 0.6733  | 2.9934 | 0.0332 | 0.0009 |
| Pik3r5        | 8.5467   | 1.0367  | 3.0714 | 0.0162 | 0.0004 |
| Lrrc75b       | 0.5633   | 0.0733  | 3.0779 | 0.0204 | 0.0005 |
| Fam241a       | 20.2433  | 2.3833  | 3.1064 | 0.0199 | 0.0005 |
| Baz1a         | 2.3167   | 0.2667  | 3.1082 | 0.0295 | 0.0008 |
| Gvin1         | 2.1800   | 0.2400  | 3.1251 | 0.0342 | 0.0009 |
| Slfn8         | 2.9233   | 0.3333  | 3.1660 | 0.0000 | 0.0000 |
| Gpr68         | 1.0967   | 0.1333  | 3.1736 | 0.0019 | 0.0000 |
| Pilrb1        | 9.9933   | 1.1200  | 3.1854 | 0.0303 | 0.0008 |
| Metap2        | 22.7600  | 2.5300  | 3.1885 | 0.0008 | 0.0000 |
| Gbp8          | 11.9433  | 1.3467  | 3.1927 | 0.0031 | 0.0001 |
| Fam84a        | 0.6967   | 0.0733  | 3.2058 | 0.0407 | 0.0012 |
| Npnt          | 8.2733   | 0.9100  | 3.2224 | 0.0370 | 0.0010 |
| Serpina3f     | 9.0133   | 0.9900  | 3.2252 | 0.0037 | 0.0001 |
| Entpd3        | 0.3000   | 0.0300  | 3.2259 | 0.0460 | 0.0013 |
| Sh3bp2        | 4.8100   | 0.5367  | 3.2276 | 0.0128 | 0.0003 |
| Acmsd         | 1.8767   | 0.2167  | 3.2288 | 0.0295 | 0.0008 |
| Efhdl         | 5.2900   | 0.5767  | 3.2671 | 0.0424 | 0.0012 |
| Slc25a37      | 113.2133 | 11.7367 | 3.2726 | 0.0279 | 0.0007 |
| Rnf123        | 2.7300   | 0.2900  | 3.2879 | 0.0335 | 0.0009 |
| Dennd2d       | 5.0833   | 0.5333  | 3.3282 | 0.0487 | 0.0014 |
| Mef2c         | 2.4067   | 0.2367  | 3.3623 | 0.0225 | 0.0006 |
| Mapk13        | 1.6867   | 0.1633  | 3.3693 | 0.0053 | 0.0001 |
| Gypc          | 5.4033   | 0.5300  | 3.3832 | 0.0197 | 0.0005 |
| Tmem26        | 2.9400   | 0.2867  | 3.3893 | 0.0270 | 0.0007 |
| Sirpa         | 17.6933  | 1.6067  | 3.4593 | 0.0089 | 0.0002 |
| Grk3          | 4.6567   | 0.4267  | 3.5268 | 0.0139 | 0.0003 |
| F2rl2         | 3.9100   | 0.3500  | 3.5314 | 0.0373 | 0.0010 |
| Fam49a        | 6.4967   | 0.5800  | 3.5480 | 0.0363 | 0.0010 |
| Cep70         | 0.6200   | 0.0600  | 3.5596 | 0.0120 | 0.0003 |
| Acot1         | 1.6367   | 0.1467  | 3.5617 | 0.0002 | 0.0000 |
| Gca           | 2.2567   | 0.1967  | 3.5690 | 0.0470 | 0.0014 |

|               |          |         |        |        |        |
|---------------|----------|---------|--------|--------|--------|
| Epb41         | 11.6033  | 1.0000  | 3.5722 | 0.0192 | 0.0005 |
| Ear2          | 13.1800  | 1.1233  | 3.5761 | 0.0237 | 0.0006 |
| Slc46a3       | 5.6700   | 0.5033  | 3.5776 | 0.0370 | 0.0010 |
| Rasal2        | 0.7767   | 0.0600  | 3.5922 | 0.0035 | 0.0001 |
| Trmo          | 1.8767   | 0.1567  | 3.6337 | 0.0258 | 0.0007 |
| Iqgap2        | 4.9667   | 0.4100  | 3.6458 | 0.0258 | 0.0007 |
| Taf10         | 2.5633   | 0.2133  | 3.6648 | 0.0423 | 0.0012 |
| Ezh2          | 8.4700   | 0.6233  | 3.6659 | 0.0397 | 0.0011 |
| Ces2g         | 10.5433  | 0.8600  | 3.6705 | 0.0371 | 0.0010 |
| Adrb1         | 1.2767   | 0.1033  | 3.6729 | 0.0292 | 0.0008 |
| Slc39a8       | 3.2300   | 0.2600  | 3.7180 | 0.0089 | 0.0002 |
| Mkrl1         | 18.7667  | 1.4233  | 3.7265 | 0.0334 | 0.0009 |
| Pilrb2        | 2.0967   | 0.1567  | 3.7768 | 0.0108 | 0.0002 |
| Fpr1          | 4.8367   | 0.3433  | 3.8590 | 0.0064 | 0.0001 |
| Epor          | 17.9833  | 1.2167  | 3.9383 | 0.0393 | 0.0011 |
| Sec14l2       | 9.6633   | 0.6267  | 3.9453 | 0.0115 | 0.0003 |
| Ccdc125       | 1.1800   | 0.0833  | 3.9794 | 0.0285 | 0.0008 |
| Ifit1bl1      | 7.2933   | 0.4900  | 3.9951 | 0.0423 | 0.0012 |
| Gzma          | 53.5433  | 3.4300  | 4.0067 | 0.0139 | 0.0003 |
| Timeless      | 0.1333   | 0.0100  | 4.0392 | 0.0121 | 0.0003 |
| Lamc3         | 0.3133   | 0.0167  | 4.0666 | 0.0003 | 0.0000 |
| Bpgm          | 73.8667  | 4.3900  | 4.1063 | 0.0151 | 0.0004 |
| Dhrs11        | 21.8700  | 1.2867  | 4.1143 | 0.0193 | 0.0005 |
| Ank1          | 1.0200   | 0.0533  | 4.2611 | 0.0170 | 0.0004 |
| Siglece       | 16.5300  | 0.8700  | 4.3427 | 0.0234 | 0.0006 |
| Dgkg          | 0.6067   | 0.0300  | 4.4208 | 0.0310 | 0.0008 |
| Muc13         | 0.7500   | 0.0400  | 4.4248 | 0.0015 | 0.0000 |
| Gp6           | 0.3633   | 0.0200  | 4.5082 | 0.0220 | 0.0006 |
| Ache          | 6.3667   | 0.3000  | 4.5213 | 0.0177 | 0.0004 |
| Kbtbd6        | 1.0967   | 0.0600  | 4.5303 | 0.0486 | 0.0014 |
| Klrc3         | 1.0400   | 0.0500  | 4.5708 | 0.0377 | 0.0011 |
| Cldn10        | 1.3433   | 0.0500  | 4.5862 | 0.0312 | 0.0008 |
| Tent5c        | 39.7533  | 1.5933  | 4.6632 | 0.0142 | 0.0003 |
| Akr1b7        | 1.3400   | 0.0533  | 4.6950 | 0.0237 | 0.0006 |
| Ifitm6        | 20.6167  | 0.8100  | 4.7158 | 0.0356 | 0.0010 |
| Ifnar2        | 6.4933   | 0.2300  | 4.7630 | 0.0333 | 0.0009 |
| Abcg4         | 9.7500   | 0.3700  | 4.7654 | 0.0045 | 0.0001 |
| Vipr1         | 1.1033   | 0.0433  | 4.8008 | 0.0073 | 0.0002 |
| F5            | 1.4900   | 0.0533  | 4.8385 | 0.0110 | 0.0003 |
| Clca3a1       | 7.9400   | 0.2767  | 4.8792 | 0.0179 | 0.0004 |
| Erfe          | 2.2233   | 0.0800  | 4.9213 | 0.0299 | 0.0008 |
| Ypel4         | 15.6367  | 0.5133  | 4.9557 | 0.0047 | 0.0001 |
| Lcn2          | 77.1133  | 2.5767  | 4.9746 | 0.0011 | 0.0000 |
| Atp7b         | 1.4033   | 0.0500  | 4.9763 | 0.0015 | 0.0000 |
| Icam4         | 13.6600  | 0.4333  | 4.9962 | 0.0220 | 0.0006 |
| Scn5a         | 0.1200   | 0.0067  | 5.0008 | 0.0401 | 0.0011 |
| Ankrd12       | 0.7000   | 0.0233  | 5.0110 | 0.0089 | 0.0002 |
| Mme           | 0.1400   | 0.0033  | 5.0516 | 0.0241 | 0.0006 |
| S1pr5         | 2.0600   | 0.0667  | 5.0595 | 0.0147 | 0.0004 |
| Slamf7        | 0.8167   | 0.0333  | 5.0972 | 0.0495 | 0.0015 |
| Rhd           | 82.0033  | 2.3433  | 5.1142 | 0.0061 | 0.0001 |
| Gm867         | 25.2267  | 0.7200  | 5.1808 | 0.0017 | 0.0000 |
| Recql5        | 4.3933   | 0.1333  | 5.2006 | 0.0000 | 0.0000 |
| Sorbs2        | 0.4167   | 0.0133  | 5.2473 | 0.0186 | 0.0005 |
| Ptprc         | 15.4533  | 0.4133  | 5.2521 | 0.0140 | 0.0003 |
| Cd24a         | 491.1833 | 13.2400 | 5.2622 | 0.0364 | 0.0010 |
| Grb7          | 0.6433   | 0.0133  | 5.3016 | 0.0088 | 0.0002 |
| Golph3l       | 5.2967   | 0.1400  | 5.3813 | 0.0000 | 0.0000 |
| Tmem35a       | 4.4400   | 0.1100  | 5.3840 | 0.0041 | 0.0001 |
| Plac8         | 0.9133   | 0.0333  | 5.4087 | 0.0238 | 0.0006 |
| a             | 3.3533   | 0.0800  | 5.5450 | 0.0002 | 0.0000 |
| Cfap74        | 0.1700   | 0.0067  | 5.5533 | 0.0270 | 0.0007 |
| Cysltr2       | 0.9533   | 0.0267  | 5.5714 | 0.0134 | 0.0003 |
| Slc40a1       | 20.8767  | 0.4500  | 5.5848 | 0.0114 | 0.0003 |
| Prtn3         | 23.0233  | 0.4900  | 5.6242 | 0.0340 | 0.0009 |
| Mfsd2b        | 21.5800  | 0.4433  | 5.6584 | 0.0014 | 0.0000 |
| Lrrc27        | 0.3200   | 0.0000  | 5.6803 | 0.0372 | 0.0010 |
| Dram1         | 0.3800   | 0.0000  | 5.7166 | 0.0455 | 0.0013 |
| Map2          | 0.0900   | 0.0000  | 5.7187 | 0.0377 | 0.0011 |
| Pde10a        | 0.0900   | 0.0033  | 5.7253 | 0.0435 | 0.0013 |
| Srr           | 0.1567   | 0.0000  | 5.7360 | 0.0417 | 0.0012 |
| Gdf6          | 2.5533   | 0.0500  | 5.7547 | 0.0191 | 0.0005 |
| Cnot2         | 2.0667   | 0.0400  | 5.8078 | 0.0034 | 0.0001 |
| Atrx          | 0.0567   | 0.0000  | 5.8089 | 0.0397 | 0.0011 |
| Ddx6          | 0.2067   | 0.0000  | 5.8144 | 0.0377 | 0.0011 |
| C130050O18Rik | 0.3367   | 0.0000  | 5.8202 | 0.0266 | 0.0007 |
| Isg20         | 14.9733  | 0.2933  | 5.8283 | 0.0064 | 0.0001 |
| Dusp3         | 1.7300   | 0.0333  | 5.8592 | 0.0030 | 0.0001 |
| Abcg2         | 2.4467   | 0.0500  | 5.8752 | 0.0151 | 0.0004 |
| Capn3         | 0.7433   | 0.0133  | 5.8997 | 0.0268 | 0.0007 |
| Xpo6          | 0.5133   | 0.0100  | 5.9124 | 0.0002 | 0.0000 |
| 2610528J11Rik | 0.6300   | 0.0000  | 5.9822 | 0.0142 | 0.0003 |



|          |          |        |        |        |        |
|----------|----------|--------|--------|--------|--------|
| Slc6a4   | 2.8067   | 0.0467 | 6.0000 | 0.0226 | 0.0006 |
| Mboat2   | 0.4833   | 0.0067 | 6.0472 | 0.0311 | 0.0008 |
| Chadl    | 0.2467   | 0.0000 | 6.0720 | 0.0123 | 0.0003 |
| Cenpp    | 0.8767   | 0.0000 | 6.0863 | 0.0088 | 0.0002 |
| Mterf2   | 0.3700   | 0.0000 | 6.0937 | 0.0080 | 0.0002 |
| Zfp810   | 0.9700   | 0.0167 | 6.1187 | 0.0066 | 0.0001 |
| Scamp1   | 0.1700   | 0.0000 | 6.1344 | 0.0073 | 0.0002 |
| Ttc6     | 0.1933   | 0.0000 | 6.1608 | 0.0151 | 0.0004 |
| Rhox8    | 0.5633   | 0.0000 | 6.1892 | 0.0417 | 0.0012 |
| Phyhip   | 7.0500   | 0.0933 | 6.1961 | 0.0156 | 0.0004 |
| Gfap     | 0.2867   | 0.0000 | 6.2147 | 0.0422 | 0.0012 |
| Naa35    | 0.3433   | 0.0000 | 6.2324 | 0.0110 | 0.0003 |
| Nr4a2    | 0.2233   | 0.0000 | 6.2370 | 0.0332 | 0.0009 |
| Daglb    | 1.0567   | 0.0133 | 6.2484 | 0.0332 | 0.0009 |
| Palb2    | 0.9400   | 0.0133 | 6.2618 | 0.0000 | 0.0000 |
| Gp5      | 5.3467   | 0.0700 | 6.2642 | 0.0017 | 0.0000 |
| Ptpn22   | 0.1967   | 0.0000 | 6.2852 | 0.0087 | 0.0002 |
| Bend3    | 0.1167   | 0.0000 | 6.2854 | 0.0097 | 0.0002 |
| Cblc     | 0.4300   | 0.0000 | 6.2932 | 0.0049 | 0.0001 |
| Mmaa     | 0.1367   | 0.0000 | 6.2972 | 0.0064 | 0.0001 |
| Wnk1     | 0.8367   | 0.0100 | 6.3087 | 0.0021 | 0.0000 |
| Cenph    | 3.6467   | 0.0500 | 6.3092 | 0.0010 | 0.0000 |
| Bcas1    | 0.2433   | 0.0000 | 6.3107 | 0.0088 | 0.0002 |
| Dennd2c  | 0.1300   | 0.0000 | 6.3553 | 0.0165 | 0.0004 |
| Shld2    | 0.2033   | 0.0000 | 6.3659 | 0.0035 | 0.0001 |
| Dock9    | 0.0900   | 0.0000 | 6.3949 | 0.0176 | 0.0004 |
| Fbxo47   | 0.1800   | 0.0000 | 6.4038 | 0.0025 | 0.0000 |
| Tshz2    | 0.1633   | 0.0000 | 6.4053 | 0.0470 | 0.0014 |
| Dmtn     | 0.9033   | 0.0133 | 6.4187 | 0.0214 | 0.0005 |
| Ikzf1    | 3.4867   | 0.0433 | 6.4289 | 0.0413 | 0.0012 |
| Abi3bp   | 0.1767   | 0.0000 | 6.4383 | 0.0340 | 0.0009 |
| Pdzk1ip1 | 23.4033  | 0.2800 | 6.4420 | 0.0070 | 0.0002 |
| Rnf14    | 0.2467   | 0.0000 | 6.4509 | 0.0014 | 0.0000 |
| Pola2    | 2.2900   | 0.0333 | 6.4539 | 0.0000 | 0.0000 |
| Irx4     | 0.3467   | 0.0000 | 6.4805 | 0.0168 | 0.0004 |
| Clec4a4  | 1.4333   | 0.0200 | 6.4821 | 0.0283 | 0.0007 |
| Thsd1    | 0.1867   | 0.0000 | 6.4898 | 0.0014 | 0.0000 |
| Il3ra    | 0.5700   | 0.0000 | 6.4944 | 0.0017 | 0.0000 |
| Tmem63c  | 0.1767   | 0.0000 | 6.4958 | 0.0202 | 0.0005 |
| S100a8   | 201.5933 | 2.3600 | 6.4959 | 0.0010 | 0.0000 |
| Lrrc56   | 0.4233   | 0.0000 | 6.5096 | 0.0197 | 0.0005 |
| Gak      | 0.1867   | 0.0000 | 6.5671 | 0.0104 | 0.0002 |
| Vrk2     | 0.5000   | 0.0000 | 6.5765 | 0.0018 | 0.0000 |
| Sin3a    | 1.5067   | 0.0167 | 6.5805 | 0.0002 | 0.0000 |
| Matk     | 0.4933   | 0.0000 | 6.6040 | 0.0015 | 0.0000 |
| Fbxl4    | 0.4733   | 0.0000 | 6.6295 | 0.0016 | 0.0000 |
| Ppwd1    | 0.5633   | 0.0000 | 6.6377 | 0.0073 | 0.0002 |
| Me3      | 0.2300   | 0.0000 | 6.6526 | 0.0071 | 0.0002 |
| Mtus1    | 0.1500   | 0.0000 | 6.6772 | 0.0070 | 0.0002 |
| Gmfg     | 0.9567   | 0.0000 | 6.6811 | 0.0010 | 0.0000 |
| Hgf      | 0.3433   | 0.0000 | 6.7099 | 0.0028 | 0.0001 |
| Alas2    | 54.3967  | 0.5267 | 6.7258 | 0.0002 | 0.0000 |
| Podxl2   | 0.4533   | 0.0000 | 6.7331 | 0.0159 | 0.0004 |
| Nat14    | 0.6933   | 0.0000 | 6.7580 | 0.0111 | 0.0003 |
| Shroom3  | 0.1433   | 0.0000 | 6.7625 | 0.0006 | 0.0000 |
| Bzw1     | 5.2267   | 0.0500 | 6.7835 | 0.0028 | 0.0001 |
| Fgd4     | 0.1200   | 0.0000 | 6.7911 | 0.0005 | 0.0000 |
| Rfx5     | 0.1833   | 0.0000 | 6.7984 | 0.0004 | 0.0000 |
| Fn3k     | 2.9833   | 0.0267 | 6.8100 | 0.0282 | 0.0007 |
| As3mt    | 0.5567   | 0.0000 | 6.8498 | 0.0017 | 0.0000 |
| Mylk3    | 2.1967   | 0.0167 | 6.8615 | 0.0440 | 0.0013 |
| Stxbp5   | 0.3067   | 0.0000 | 6.9024 | 0.0031 | 0.0001 |
| Samd11   | 3.1033   | 0.0300 | 6.9074 | 0.0241 | 0.0006 |
| Trim30d  | 0.8667   | 0.0000 | 6.9257 | 0.0057 | 0.0001 |
| Tspan33  | 22.5467  | 0.1800 | 6.9269 | 0.0046 | 0.0001 |
| Enox2    | 0.2800   | 0.0000 | 6.9439 | 0.0003 | 0.0000 |
| Ube2e3   | 0.5500   | 0.0000 | 6.9582 | 0.0010 | 0.0000 |
| Zcche9   | 0.8767   | 0.0000 | 6.9630 | 0.0032 | 0.0001 |
| Blm      | 0.2367   | 0.0000 | 6.9633 | 0.0010 | 0.0000 |
| Ttc41    | 0.1967   | 0.0000 | 6.9815 | 0.0039 | 0.0001 |
| Igf1     | 0.1533   | 0.0000 | 6.9883 | 0.0005 | 0.0000 |
| Nfe2     | 11.1833  | 0.0967 | 7.0493 | 0.0000 | 0.0000 |
| Mpp7     | 0.2433   | 0.0000 | 7.0639 | 0.0070 | 0.0002 |
| Mea1     | 1.2400   | 0.0000 | 7.1004 | 0.0231 | 0.0006 |
| Zfp758   | 0.2967   | 0.0000 | 7.1069 | 0.0011 | 0.0000 |
| Cdc6     | 0.2700   | 0.0000 | 7.1088 | 0.0001 | 0.0000 |
| Csf3r    | 1.6967   | 0.0167 | 7.1655 | 0.0046 | 0.0001 |
| Ammecr11 | 0.2767   | 0.0000 | 7.1798 | 0.0045 | 0.0001 |
| Zfp41    | 0.3433   | 0.0000 | 7.2020 | 0.0008 | 0.0000 |
| Cadps2   | 0.2700   | 0.0000 | 7.2108 | 0.0007 | 0.0000 |
| Nrip3    | 0.6500   | 0.0033 | 7.2270 | 0.0327 | 0.0009 |
| Ift88    | 0.4700   | 0.0000 | 7.2320 | 0.0028 | 0.0001 |

|               |          |        |        |        |        |
|---------------|----------|--------|--------|--------|--------|
| Tgfb1i1       | 0.7900   | 0.0000 | 7.2440 | 0.0004 | 0.0000 |
| Dpep2         | 1.0200   | 0.0000 | 7.2514 | 0.0008 | 0.0000 |
| Slamf6        | 0.5400   | 0.0000 | 7.2551 | 0.0085 | 0.0002 |
| B430306N03Rik | 0.3967   | 0.0000 | 7.2566 | 0.0019 | 0.0000 |
| Trem1l        | 7.7067   | 0.0533 | 7.2630 | 0.0054 | 0.0001 |
| Ikzf4         | 0.2600   | 0.0000 | 7.2706 | 0.0084 | 0.0002 |
| Ly6g          | 2.9967   | 0.0200 | 7.2846 | 0.0293 | 0.0008 |
| Mtrr          | 0.4333   | 0.0000 | 7.3221 | 0.0424 | 0.0012 |
| St3gal6       | 0.8267   | 0.0000 | 7.3427 | 0.0022 | 0.0000 |
| Col17a1       | 0.2700   | 0.0000 | 7.3443 | 0.0001 | 0.0000 |
| Gsap          | 0.3933   | 0.0000 | 7.3596 | 0.0000 | 0.0000 |
| Arid3b        | 0.3667   | 0.0000 | 7.3610 | 0.0000 | 0.0000 |
| Sbno1         | 0.2700   | 0.0000 | 7.3694 | 0.0007 | 0.0000 |
| Tmprss13      | 0.4533   | 0.0000 | 7.3939 | 0.0001 | 0.0000 |
| Dlc1          | 0.2567   | 0.0000 | 7.4268 | 0.0155 | 0.0004 |
| Il1rl2        | 0.3800   | 0.0000 | 7.4304 | 0.0002 | 0.0000 |
| Itgad         | 8.4100   | 0.0567 | 7.4699 | 0.0093 | 0.0002 |
| Ankle1        | 0.6100   | 0.0000 | 7.5299 | 0.0024 | 0.0000 |
| Aqp9          | 0.6000   | 0.0000 | 7.5372 | 0.0009 | 0.0000 |
| S100a9        | 184.1300 | 0.9967 | 7.5383 | 0.0064 | 0.0001 |
| Tmem215       | 1.3967   | 0.0067 | 7.5493 | 0.0217 | 0.0005 |
| Ppbp          | 80.8300  | 0.4367 | 7.5853 | 0.0009 | 0.0000 |
| Zfp451        | 0.4433   | 0.0000 | 7.5945 | 0.0012 | 0.0000 |
| Spag7         | 1.5933   | 0.0000 | 7.6146 | 0.0000 | 0.0000 |
| Tal1          | 15.3767  | 0.0833 | 7.6368 | 0.0407 | 0.0012 |
| Snca          | 8.1300   | 0.0400 | 7.6609 | 0.0024 | 0.0000 |
| Fkrp          | 4.7133   | 0.0300 | 7.6650 | 0.0343 | 0.0009 |
| Rasa4         | 0.6433   | 0.0000 | 7.6653 | 0.0001 | 0.0000 |
| C1qtnf5       | 1.5033   | 0.0000 | 7.6723 | 0.0000 | 0.0000 |
| Cenpi         | 0.5267   | 0.0000 | 7.6825 | 0.0002 | 0.0000 |
| Ctse          | 156.5233 | 0.7767 | 7.7086 | 0.0020 | 0.0000 |
| Pik3cd        | 2.0267   | 0.0100 | 7.7154 | 0.0000 | 0.0000 |
| Ltf           | 35.7067  | 0.1667 | 7.7431 | 0.0000 | 0.0000 |
| Slc38a9       | 0.2167   | 0.0000 | 7.7459 | 0.0009 | 0.0000 |
| Ktn1          | 0.3000   | 0.0000 | 7.7460 | 0.0001 | 0.0000 |
| Mtx3          | 1.1467   | 0.0067 | 7.7795 | 0.0000 | 0.0000 |
| Rbm4          | 0.7567   | 0.0000 | 7.8056 | 0.0012 | 0.0000 |
| Pex7          | 1.1500   | 0.0000 | 7.8092 | 0.0000 | 0.0000 |
| Mllt10        | 0.5100   | 0.0000 | 7.8117 | 0.0000 | 0.0000 |
| Afg1l         | 0.8400   | 0.0000 | 7.8255 | 0.0000 | 0.0000 |
| LOC102639653  | 0.5100   | 0.0000 | 7.8281 | 0.0001 | 0.0000 |
| Rit1          | 1.3433   | 0.0000 | 7.8322 | 0.0028 | 0.0001 |
| Tfr2          | 0.5967   | 0.0000 | 7.8409 | 0.0104 | 0.0002 |
| Ifit1bl2      | 0.6033   | 0.0000 | 7.8534 | 0.0002 | 0.0000 |
| Cacnb3        | 0.6567   | 0.0000 | 7.8926 | 0.0000 | 0.0000 |
| Polr3e        | 0.5200   | 0.0000 | 7.9252 | 0.0000 | 0.0000 |
| Dennd1a       | 0.4967   | 0.0000 | 7.9253 | 0.0000 | 0.0000 |
| Rnf144a       | 0.4067   | 0.0000 | 7.9277 | 0.0000 | 0.0000 |
| Rpp38         | 0.8200   | 0.0000 | 7.9401 | 0.0136 | 0.0003 |
| Btnl10        | 17.7767  | 0.0767 | 7.9461 | 0.0000 | 0.0000 |
| Vipas39       | 0.9067   | 0.0000 | 7.9500 | 0.0000 | 0.0000 |
| P2ry12        | 0.8900   | 0.0000 | 7.9503 | 0.0008 | 0.0000 |
| Wdr25         | 0.8333   | 0.0000 | 7.9578 | 0.0002 | 0.0000 |
| Gna15         | 0.9467   | 0.0000 | 7.9608 | 0.0008 | 0.0000 |
| Gli2          | 0.3233   | 0.0000 | 7.9635 | 0.0000 | 0.0000 |
| Iba57         | 0.5533   | 0.0000 | 7.9637 | 0.0001 | 0.0000 |
| Abi2          | 0.4733   | 0.0000 | 7.9657 | 0.0000 | 0.0000 |
| Mettl5        | 2.4533   | 0.0000 | 7.9727 | 0.0000 | 0.0000 |
| Foxp1         | 0.3033   | 0.0000 | 7.9857 | 0.0003 | 0.0000 |
| Invs          | 0.4067   | 0.0000 | 8.0030 | 0.0003 | 0.0000 |
| Mcm8          | 0.7133   | 0.0000 | 8.0113 | 0.0009 | 0.0000 |
| Nsmf          | 0.8167   | 0.0000 | 8.0249 | 0.0000 | 0.0000 |
| Tubb1         | 9.9433   | 0.0400 | 8.0406 | 0.0022 | 0.0000 |
| Spns2         | 0.7967   | 0.0000 | 8.0414 | 0.0005 | 0.0000 |
| Hivep2        | 0.2467   | 0.0000 | 8.0443 | 0.0002 | 0.0000 |
| Gfi1b         | 14.1567  | 0.0567 | 8.0524 | 0.0280 | 0.0007 |
| Hars2         | 0.7900   | 0.0000 | 8.0602 | 0.0015 | 0.0000 |
| Pms1          | 0.7900   | 0.0000 | 8.0960 | 0.0000 | 0.0000 |
| Caprin2       | 0.8433   | 0.0000 | 8.1359 | 0.0000 | 0.0000 |
| Ctnnd2        | 0.4367   | 0.0000 | 8.1442 | 0.0001 | 0.0000 |
| Klhl15        | 0.4233   | 0.0000 | 8.2082 | 0.0001 | 0.0000 |
| Nxpe2         | 3.0367   | 0.0167 | 8.2083 | 0.0074 | 0.0002 |
| Epb42         | 20.0267  | 0.0700 | 8.2114 | 0.0006 | 0.0000 |
| Clasrp        | 1.1967   | 0.0000 | 8.2154 | 0.0000 | 0.0000 |
| Arhgap15      | 0.9133   | 0.0000 | 8.2160 | 0.0044 | 0.0001 |
| Gramd1b       | 0.3600   | 0.0000 | 8.2218 | 0.0000 | 0.0000 |
| Dact1         | 0.7133   | 0.0000 | 8.2349 | 0.0000 | 0.0000 |
| Fancm         | 0.3600   | 0.0000 | 8.2399 | 0.0000 | 0.0000 |
| Tanc2         | 0.2367   | 0.0000 | 8.2838 | 0.0000 | 0.0000 |
| Dapk2         | 2.2467   | 0.0000 | 8.2898 | 0.0014 | 0.0000 |
| Spice1        | 0.6900   | 0.0000 | 8.2934 | 0.0000 | 0.0000 |
| Rec8          | 1.3333   | 0.0000 | 8.2983 | 0.0054 | 0.0001 |

|          |            |         |        |        |        |
|----------|------------|---------|--------|--------|--------|
| Paqr9    | 16.8667    | 0.0567  | 8.3040 | 0.0163 | 0.0004 |
| Sirt2    | 1.3367     | 0.0000  | 8.3142 | 0.0093 | 0.0002 |
| Gabpb1   | 1.3900     | 0.0000  | 8.3469 | 0.0070 | 0.0002 |
| Ccdc66   | 0.6500     | 0.0000  | 8.3664 | 0.0000 | 0.0000 |
| Slc2a6   | 1.4200     | 0.0000  | 8.3762 | 0.0000 | 0.0000 |
| Gata1    | 37.8900    | 0.1167  | 8.3816 | 0.0009 | 0.0000 |
| Zcchc18  | 1.2200     | 0.0000  | 8.3839 | 0.0265 | 0.0007 |
| Pdia2    | 1.7067     | 0.0000  | 8.3920 | 0.0128 | 0.0003 |
| Rangap1  | 1.0067     | 0.0000  | 8.4110 | 0.0000 | 0.0000 |
| Shtn1    | 0.7467     | 0.0000  | 8.4155 | 0.0001 | 0.0000 |
| Cd5      | 1.5067     | 0.0000  | 8.4552 | 0.0000 | 0.0000 |
| Golga4   | 0.4400     | 0.0000  | 8.5136 | 0.0000 | 0.0000 |
| Nt5c3    | 2.1933     | 0.0000  | 8.5213 | 0.0002 | 0.0000 |
| Nkx2-5   | 4.0600     | 0.0100  | 8.5259 | 0.0071 | 0.0002 |
| Dclk1    | 0.6600     | 0.0000  | 8.5318 | 0.0000 | 0.0000 |
| Clstn1   | 5.2733     | 0.0200  | 8.5329 | 0.0014 | 0.0000 |
| Sidt1    | 0.7067     | 0.0000  | 8.5333 | 0.0005 | 0.0000 |
| Sowaha   | 4.9300     | 0.0133  | 8.5437 | 0.0002 | 0.0000 |
| Sh3tc2   | 0.6933     | 0.0000  | 8.5470 | 0.0000 | 0.0000 |
| Hbb-bs   | 30705.2033 | 83.3300 | 8.5559 | 0.0001 | 0.0000 |
| Ndrp2    | 1.5933     | 0.0000  | 8.5615 | 0.0000 | 0.0000 |
| Nr5a1    | 3.9500     | 0.0133  | 8.5945 | 0.0144 | 0.0003 |
| Baiap3   | 0.7067     | 0.0000  | 8.5965 | 0.0001 | 0.0000 |
| Camp     | 86.1467    | 0.2200  | 8.6064 | 0.0002 | 0.0000 |
| Nsg2     | 1.5567     | 0.0000  | 8.6580 | 0.0436 | 0.0013 |
| Milt3    | 0.6500     | 0.0000  | 8.6678 | 0.0000 | 0.0000 |
| Psd4     | 1.1233     | 0.0000  | 8.6832 | 0.0018 | 0.0000 |
| Sigirr   | 3.2700     | 0.0000  | 8.6891 | 0.0000 | 0.0000 |
| Tspan8   | 2.4567     | 0.0000  | 8.7074 | 0.0001 | 0.0000 |
| Ddhd2    | 0.9167     | 0.0000  | 8.7327 | 0.0000 | 0.0000 |
| Blvrb    | 5.1233     | 0.0000  | 8.7361 | 0.0001 | 0.0000 |
| Thap12   | 1.1133     | 0.0000  | 8.7589 | 0.0000 | 0.0000 |
| Pfkfb3   | 0.8033     | 0.0000  | 8.7642 | 0.0015 | 0.0000 |
| Ptpre    | 0.6833     | 0.0000  | 8.7651 | 0.0001 | 0.0000 |
| Miga2    | 1.1533     | 0.0000  | 8.7917 | 0.0000 | 0.0000 |
| Tex2     | 0.8933     | 0.0000  | 8.7957 | 0.0230 | 0.0006 |
| Hba-a2   | 29359.9000 | 67.7933 | 8.8007 | 0.0000 | 0.0000 |
| Gm46223  | 13.7300    | 0.0400  | 8.8073 | 0.0002 | 0.0000 |
| Trak1    | 0.8167     | 0.0000  | 8.8697 | 0.0005 | 0.0000 |
| Cldn13   | 75.6133    | 0.1700  | 8.8765 | 0.0038 | 0.0001 |
| Fam83g   | 0.8533     | 0.0000  | 8.9019 | 0.0010 | 0.0000 |
| Hemgn    | 74.3067    | 0.1600  | 8.9056 | 0.0006 | 0.0000 |
| Rufy3    | 1.3133     | 0.0000  | 8.9070 | 0.0001 | 0.0000 |
| Ccdc88a  | 1.0200     | 0.0033  | 8.9113 | 0.0432 | 0.0013 |
| Hba-a1   | 44420.5333 | 93.4833 | 8.9278 | 0.0000 | 0.0000 |
| Mlh3     | 0.7400     | 0.0000  | 8.9371 | 0.0000 | 0.0000 |
| Nfia     | 0.8900     | 0.0033  | 8.9436 | 0.0417 | 0.0012 |
| Odf2     | 1.2367     | 0.0000  | 8.9763 | 0.0000 | 0.0000 |
| Prdm1    | 0.8933     | 0.0000  | 9.0174 | 0.0001 | 0.0000 |
| Cd1d1    | 2.3633     | 0.0000  | 9.0273 | 0.0002 | 0.0000 |
| Tex10    | 1.7500     | 0.0000  | 9.0325 | 0.0000 | 0.0000 |
| Rpap1    | 0.9533     | 0.0000  | 9.0521 | 0.0000 | 0.0000 |
| Dlg5     | 0.6500     | 0.0000  | 9.0947 | 0.0000 | 0.0000 |
| Fam13b   | 1.0200     | 0.0000  | 9.1005 | 0.0000 | 0.0000 |
| Atxn2    | 1.1000     | 0.0000  | 9.1260 | 0.0000 | 0.0000 |
| Ppm1b    | 3.2167     | 0.0067  | 9.1549 | 0.0000 | 0.0000 |
| Zfc3h1   | 0.7367     | 0.0000  | 9.1561 | 0.0000 | 0.0000 |
| Ptbp3    | 0.7567     | 0.0000  | 9.1668 | 0.0078 | 0.0002 |
| Klf1     | 87.3967    | 0.1600  | 9.1696 | 0.0000 | 0.0000 |
| Man1a    | 1.0800     | 0.0000  | 9.1713 | 0.0000 | 0.0000 |
| Gp9      | 12.3667    | 0.0200  | 9.1998 | 0.0032 | 0.0001 |
| P2ry10b  | 1.7800     | 0.0000  | 9.2459 | 0.0001 | 0.0000 |
| Ly6i     | 5.6133     | 0.0000  | 9.2462 | 0.0000 | 0.0000 |
| Nacc2    | 1.6700     | 0.0033  | 9.2481 | 0.0000 | 0.0000 |
| Map4k4   | 0.9300     | 0.0000  | 9.2772 | 0.0000 | 0.0000 |
| Apol11a  | 23.4733    | 0.0433  | 9.2831 | 0.0009 | 0.0000 |
| Hbq1b    | 14.9667    | 0.0200  | 9.3173 | 0.0302 | 0.0008 |
| Vps8     | 1.1700     | 0.0000  | 9.3469 | 0.0000 | 0.0000 |
| Suco     | 0.9900     | 0.0000  | 9.3710 | 0.0000 | 0.0000 |
| Tiam1    | 0.8200     | 0.0000  | 9.4318 | 0.0000 | 0.0000 |
| Sphk1    | 3.9900     | 0.0000  | 9.4330 | 0.0000 | 0.0000 |
| Trim58   | 5.5000     | 0.0067  | 9.4679 | 0.0270 | 0.0007 |
| Agpat1   | 3.3467     | 0.0000  | 9.4818 | 0.0000 | 0.0000 |
| Osbpl3   | 0.9733     | 0.0000  | 9.5093 | 0.0001 | 0.0000 |
| Crispld2 | 1.5800     | 0.0000  | 9.5133 | 0.0000 | 0.0000 |
| Prr14l   | 0.6233     | 0.0000  | 9.5149 | 0.0000 | 0.0000 |
| Rnf216   | 1.4567     | 0.0000  | 9.5342 | 0.0000 | 0.0000 |
| Tfdp2    | 0.9233     | 0.0000  | 9.5599 | 0.0002 | 0.0000 |
| Trp53i11 | 2.1733     | 0.0000  | 9.5616 | 0.0000 | 0.0000 |
| Nkx2-3   | 6.0167     | 0.0067  | 9.5748 | 0.0242 | 0.0006 |
| Mapk7    | 2.3867     | 0.0000  | 9.6025 | 0.0000 | 0.0000 |
| Cramp1l  | 0.9167     | 0.0000  | 9.6278 | 0.0000 | 0.0000 |

|               |           |        |         |        |        |
|---------------|-----------|--------|---------|--------|--------|
| Rtn4rl1       | 2.0900    | 0.0000 | 9.6424  | 0.0000 | 0.0000 |
| Rps6kb1       | 1.5400    | 0.0000 | 9.6730  | 0.0000 | 0.0000 |
| 1300017J02Rik | 6.1733    | 0.0067 | 9.6934  | 0.0008 | 0.0000 |
| Tent5a        | 1.3367    | 0.0000 | 9.7074  | 0.0000 | 0.0000 |
| Serping1      | 3.9333    | 0.0000 | 9.7130  | 0.0000 | 0.0000 |
| Acp5          | 2.9100    | 0.0000 | 9.7716  | 0.0012 | 0.0000 |
| Ubtf          | 1.8067    | 0.0000 | 9.7877  | 0.0000 | 0.0000 |
| Papola        | 1.7867    | 0.0033 | 9.8019  | 0.0141 | 0.0003 |
| Csnk1a1       | 1.8700    | 0.0000 | 9.8092  | 0.0002 | 0.0000 |
| Cflar         | 1.2067    | 0.0000 | 9.8258  | 0.0000 | 0.0000 |
| Zmiz2         | 1.7067    | 0.0000 | 9.8297  | 0.0000 | 0.0000 |
| Hbb-bt        | 5994.2867 | 6.8433 | 9.8308  | 0.0000 | 0.0000 |
| Abcc9         | 1.0633    | 0.0000 | 9.8482  | 0.0000 | 0.0000 |
| Zfp180        | 2.2567    | 0.0000 | 9.9299  | 0.0000 | 0.0000 |
| Clec1b        | 7.3767    | 0.0000 | 9.9339  | 0.0009 | 0.0000 |
| Tcf21         | 13.8200   | 0.0133 | 9.9725  | 0.0168 | 0.0004 |
| Ngp           | 243.7567  | 0.2533 | 9.9769  | 0.0000 | 0.0000 |
| Hmbs          | 192.1033  | 0.2100 | 9.9934  | 0.0016 | 0.0000 |
| Tlx1          | 8.6267    | 0.0067 | 10.0369 | 0.0163 | 0.0004 |
| Gnptab        | 1.9700    | 0.0000 | 10.0408 | 0.0000 | 0.0000 |
| Spta1         | 11.7633   | 0.0100 | 10.0519 | 0.0023 | 0.0000 |
| Sh2b3         | 2.3933    | 0.0000 | 10.0912 | 0.0000 | 0.0000 |
| Elane         | 37.5433   | 0.0333 | 10.1248 | 0.0025 | 0.0001 |
| Itr2          | 0.8433    | 0.0000 | 10.1369 | 0.0000 | 0.0000 |
| Sox6          | 1.2100    | 0.0000 | 10.2152 | 0.0015 | 0.0000 |
| Lpin2         | 1.8500    | 0.0000 | 10.2498 | 0.0000 | 0.0000 |
| Mpo           | 30.6700   | 0.0267 | 10.2914 | 0.0000 | 0.0000 |
| Cbfa2t3       | 1.6700    | 0.0000 | 10.4866 | 0.0001 | 0.0000 |
| Myo7a         | 1.8233    | 0.0000 | 10.5543 | 0.0000 | 0.0000 |
| Golim4        | 3.3600    | 0.0000 | 10.7375 | 0.0000 | 0.0000 |
| Brd4          | 2.6633    | 0.0000 | 10.8251 | 0.0000 | 0.0000 |
| Apol10a       | 10.2233   | 0.0067 | 10.8309 | 0.0082 | 0.0002 |
| Apol11b       | 173.2600  | 0.1000 | 10.8863 | 0.0000 | 0.0000 |
| Rhag          | 38.2933   | 0.0267 | 10.8900 | 0.0143 | 0.0003 |
| Mtmr12        | 3.8967    | 0.0000 | 10.8935 | 0.0000 | 0.0000 |
| Ipcefl        | 2.7467    | 0.0000 | 10.9372 | 0.0000 | 0.0000 |
| Sfswap        | 5.2433    | 0.0000 | 10.9549 | 0.0489 | 0.0014 |
| Sdcbp         | 6.8067    | 0.0000 | 10.9779 | 0.0482 | 0.0014 |
| Trim10        | 41.9767   | 0.0200 | 10.9910 | 0.0009 | 0.0000 |
| Gdpd2         | 13.7067   | 0.0067 | 10.9918 | 0.0068 | 0.0001 |
| Ifit2         | 4.5233    | 0.0000 | 11.0026 | 0.0482 | 0.0014 |
| Slc25a38      | 10.3800   | 0.0000 | 11.0159 | 0.0002 | 0.0000 |
| Btrc          | 4.0300    | 0.0000 | 11.0486 | 0.0467 | 0.0014 |
| Slc43a1       | 7.7600    | 0.0000 | 11.0495 | 0.0460 | 0.0013 |
| Fcrla         | 10.9533   | 0.0000 | 11.0498 | 0.0460 | 0.0013 |
| Kmt2d         | 1.0167    | 0.0000 | 11.0530 | 0.0023 | 0.0000 |
| Apol8         | 6.7133    | 0.0000 | 11.0749 | 0.0457 | 0.0013 |
| Trem14        | 11.3300   | 0.0000 | 11.1636 | 0.0430 | 0.0012 |
| Specc1        | 3.3100    | 0.0000 | 11.1945 | 0.0433 | 0.0013 |
| Pklr          | 7.7900    | 0.0000 | 11.2911 | 0.0395 | 0.0011 |
| Slc4a1        | 283.7067  | 0.1133 | 11.3513 | 0.0000 | 0.0000 |
| Kel           | 37.1867   | 0.0133 | 11.4808 | 0.0046 | 0.0001 |
| Tbcel         | 5.5700    | 0.0000 | 11.5550 | 0.0000 | 0.0000 |
| Car2          | 15.1467   | 0.0000 | 11.6076 | 0.0320 | 0.0009 |
| Pik3r1        | 4.7633    | 0.0000 | 11.6342 | 0.0000 | 0.0000 |
| Slfn14        | 7.5433    | 0.0000 | 11.6447 | 0.0328 | 0.0009 |
| Tspo2         | 36.5733   | 0.0000 | 11.9162 | 0.0261 | 0.0007 |
| Gramd3        | 13.2933   | 0.0000 | 11.9367 | 0.0260 | 0.0007 |
| Gm1966        | 5.0933    | 0.0000 | 12.3173 | 0.0001 | 0.0000 |
| Fnbp1         | 8.3300    | 0.0000 | 12.3451 | 0.0204 | 0.0005 |
| Bnip3l        | 14.5600   | 0.0000 | 12.3551 | 0.0000 | 0.0000 |
| Slc38a5       | 25.2733   | 0.0000 | 12.4056 | 0.0189 | 0.0005 |
| Cpeb4         | 6.5233    | 0.0000 | 12.4601 | 0.0000 | 0.0000 |
| Ppp1r18       | 17.8867   | 0.0000 | 12.4763 | 0.0204 | 0.0005 |
| Gypa          | 114.1967  | 0.0167 | 12.6917 | 0.0023 | 0.0000 |
| Arrb1         | 8.5367    | 0.0000 | 12.7694 | 0.0000 | 0.0000 |
| Add2          | 7.6100    | 0.0000 | 12.7844 | 0.0150 | 0.0004 |
| Lmo2          | 42.3000   | 0.0000 | 12.8371 | 0.0147 | 0.0004 |
| Car1          | 84.7133   | 0.0000 | 13.4833 | 0.0092 | 0.0002 |

---
