# Supplementary material for: Identification of CBPA as a New Inhibitor of PD-1/PD-L1 Interaction
Source: MDPI journal article supplement (doi:10.3390/ijms24043971), 2023-02-16
Supplement: s1 [file s1]

**Table S1. Results of cross-docking by the Glide SP mode and Glide XP mode**

| Results of cross-docking by the Glide SP mode |       |       |       |       |
|-----------------------------------------------|-------|-------|-------|-------|
| Structure                                     | RMSD  |       |       |       |
|                                               | 5J8O  | 5J89  | 5N2D  | 5N2F  |
| 5J8O                                          | 0.80  | 14.87 | 15.65 | 18.71 |
| 5J89                                          | 16.42 | 1.39  | 1.21  | 7.83  |
| 5N2D                                          | 16.65 | 1.79  | 1.08  | 6.25  |
| 5N2F                                          | 16.23 | 3.29  | 2.94  | 4.19  |

  

| Results of cross-docking by the Glide XP mode |       |       |       |       |
|-----------------------------------------------|-------|-------|-------|-------|
| Structure                                     | RMSD  |       |       |       |
|                                               | 5J8O  | 5J89  | 5N2D  | 5N2F  |
| 5J8O                                          | 0.78  | 15.26 | 16.59 | 16.59 |
| 5J89                                          | 16.41 | 1.47  | 7.50  | 7.50  |
| 5N2D                                          | 16.52 | 1.05  | 3.54  | 3.54  |
| 5N2F                                          | 15.62 | 2.33  | 4.14  | 4.14  |
