# Supplementary material for: Identification of CBPA as a New Inhibitor of PD-1/PD-L1 Interaction
Source: MDPI journal article supplement (doi:10.3390/ijms24043971), 2023-02-16
Supplement: s1 [file s1]

**Table S3. KEGG pathway terms enriched through GSEA**

| <b>Enriched KEGG pathway terms by genes down-expressed in<br/>CBPA-treated group</b> |            |                  |
|--------------------------------------------------------------------------------------|------------|------------------|
| <b>KEGG Pathway Term</b>                                                             | <b>NES</b> | <b>FDR q-val</b> |
| Ribosome                                                                             | -2.2520    | <0.0001          |
| Carbon metabolism                                                                    | -2.0960    | 7.01E-04         |
| Carbon fixation in photosynthetic organisms                                          | -2.0461    | 1.36E-03         |
| Biosynthesis of antibiotics                                                          | -2.0645    | 1.37E-03         |
| Biosynthesis of amino acids                                                          | -1.9305    | 8.89E-03         |
| Methane metabolism                                                                   | -1.9475    | 9.25E-03         |
| Citrate cycle (TCA cycle)                                                            | -1.8932    | 1.20E-02         |
| Relaxin signaling pathway                                                            | -1.8212    | 2.21E-02         |
| Focal adhesion                                                                       | -1.7799    | 3.06E-02         |
| Vasopressin-regulated water reabsorption                                             | -1.7644    | 3.14E-02         |
| Glycolysis / Gluconeogenesis                                                         | -1.7515    | 3.16E-02         |
| Fructose and mannose metabolism                                                      | -1.6870    | 4.68E-02         |
| ECM-receptor interaction                                                             | -1.6926    | 4.80E-02         |
| <b>Enriched KEGG pathway terms by genes up-expressed in<br/>CBPA-treated group</b>   |            |                  |
| <b>KEGG Pathway Term</b>                                                             | <b>NES</b> | <b>FDR q-val</b> |
| Hematopoietic cell lineage                                                           | 2.7267     | <0.0001          |
| Intestinal immune network for IgA production                                         | 2.4479     | <0.0001          |
| Antigen processing and presentation                                                  | 2.3094     | <0.0001          |
| Natural killer cell mediated cytotoxicity                                            | 2.2978     | <0.0001          |
| Th1 and Th2 cell differentiation                                                     | 2.1721     | <0.0001          |
| Cytokine-cytokine receptor interaction                                               | 2.1705     | <0.0001          |
| Cell adhesion molecules (CAMs)                                                       | 2.1693     | <0.0001          |
| NOD-like receptor signaling pathway                                                  | 2.0240     | 8.81E-04         |
| ABC transporters                                                                     | 2.0262     | 8.95E-04         |
| NF-kappa B signaling pathway                                                         | 2.0104     | 1.00E-03         |
| Th17 cell differentiation                                                            | 1.9979     | 1.11E-03         |
| T cell receptor signaling pathway                                                    | 1.9860     | 1.19E-03         |
| Jak-STAT signaling pathway                                                           | 1.9200     | 2.80E-03         |
| B cell receptor signaling pathway                                                    | 1.9100     | 2.89E-03         |
| Osteoclast differentiation                                                           | 1.8894     | 3.16E-03         |
| Neuroactive ligand-receptor interaction                                              | 1.8695     | 3.49E-03         |
| Cytosolic DNA-sensing pathway                                                        | 1.8045     | 7.36E-03         |
| Platelet activation                                                                  | 1.7511     | 1.22E-02         |
| Fc epsilon RI signaling pathway                                                      | 1.7343     | 1.37E-02         |
| Necroptosis                                                                          | 1.7265     | 1.41E-02         |
| RIG-I-like receptor signaling pathway                                                | 1.6282     | 3.33E-02         |
| Phagosome                                                                            | 1.6030     | 3.92E-02         |
